1 Phylogenomic analyses of non-Dikarya fungi supports horizontal gene transfer driving  
2 diversification of secondary metabolism in the amphibian gastrointestinal symbiont,  
3 *Basidiobolus*

4  
5 Javier F. Tabima<sup>1</sup>

6 Ian A. Trautman<sup>1</sup>

7 Ying Chang<sup>1</sup>

8 Yan Wang<sup>2,3,4</sup>

9 Stephen Mondo<sup>5</sup>

10 Alan Kuo<sup>5</sup>

11 Asaf Salamov<sup>5</sup>

12 Igor V. Grigoriev<sup>5,6</sup>

13 Jason E. Stajich<sup>2,3</sup>

14 Joseph W. Spatafora<sup>1</sup>

15

16 **Affiliations:**

17 1. Department of Botany and Plant Pathology, College of Agricultural Sciences, Oregon State  
18 University, Corvallis, USA

19 2. Department of Microbiology and Plant Pathology, University of California—Riverside,  
20 Riverside, California, USA

21 3. Institute for Integrative Genome Biology, University of California—Riverside, Riverside,  
22 California, USA

23 4. Current address: Department of Biological Sciences, University of Toronto Scarborough,  
24 Toronto, Ontario, Canada and the Department of Ecology and Evolutionary Biology, University  
25 of Toronto, Toronto, Ontario, Canada

- 26 5. US Department of Energy Joint Genome Institute, Lawrence Berkeley National Laboratory,  
27 Berkeley, California, USA  
28 6. Department of Plant and Microbial Biology, University of California-Berkeley, Berkeley,  
29 California, USA  
30  
31

32 **Abstract**

33 Research into secondary metabolism (SM) production by fungi has resulted in the discovery of  
34 diverse, biologically active compounds with significant medicinal applications. However, the  
35 fungi rich in SM production are taxonomically restricted to Dikarya, two phyla of Kingdom  
36 Fungi, Ascomycota and Basidiomycota. Here, we explore the potential for SM production in  
37 Mucoromycota and Zoopagomycota, two phyla of nonflagellated fungi that are not members of  
38 Dikarya, by predicting and identifying core genes and gene clusters involved in SM. The  
39 majority of non-Dikarya have few genes and gene clusters involved in SM production except for  
40 the amphibian gut symbionts in the genus *Basidiobolus*. *Basidiobolus* genomes exhibit an  
41 enrichment of SM genes involved in siderophore, surfactin-like, and terpene cyclase production,  
42 all these with evidence of constitutive gene expression. Gene expression and chemical assays  
43 confirm that *Basidiobolus* has significant siderophore activity. The expansion of SMs in  
44 *Basidiobolus* are partially due to horizontal gene transfer from bacteria, likely as a consequence  
45 of its ecology as an amphibian gut endosymbiont.

46

47

## 48 **Introduction**

49 Fungi produce a wealth of biologically active small molecules – secondary or specialized  
50 metabolites – that function in interactions with other organisms, environmental sensing, growth  
51 and development, and numerous other processes (Rokas et al. 2020). Several of these  
52 compounds have led to the successful development of pharmaceuticals (e.g., antibiotics,  
53 immunosuppressants, statins, etc.) that have had dramatic and positive impacts on human health.  
54 Understanding the evolution of fungal secondary metabolites and linking them with their  
55 ecological and physiological functions in nature can inform searches for compounds with  
56 applications in human society.

57 Secondary metabolism (SM) is imprecisely defined but can be characterized generally as  
58 the production of bioactive compounds that are not part of primary metabolism and that are not  
59 required for growth and survival in the laboratory (Keller et al 2005, Brakhage 2013, Rokas et al.  
60 2020). In fungi, the genes responsible for the synthesis of secondary metabolites are frequently  
61 co-located in biosynthetic gene clusters (Smith et al. 1990, Brakhage 2013), which contain the  
62 genes that control regulation of expression, biosynthesis, tailoring, and transport of these  
63 compounds out of the cell (Smith et al. 1990, Keller et al 2005, Osbourn 2010). In the kingdom  
64 Fungi, the diversity of products synthesized via SM is substantial and primarily includes  
65 alkaloids, peptides, polyketides, and terpenes (Collemare et al. 2008, Helaly et al. 2018). Each  
66 of these groups of compounds are synthesized by core genes that are characteristic of the  
67 pathways and include, but are not limited to, dimethylallyl tryptophan synthases (DMAT), non-  
68 ribosomal peptide synthetases (NRPS), polyketide synthetases (PKS), and terpene cyclases (TC).  
69 These bioactive compounds fulfill various roles that are hypothesized to increase the fitness of  
70 the fungus by promoting better recognition and adaptation to environmental cues.

71 Biosynthesis of secondary metabolites is heterogeneous across the fungal tree of life, but  
72 the vast majority of discovered and predicted secondary metabolites are reported within the  
73 fungal phyla Ascomycota and Basidiomycota of the subkingdom Dikarya. Filamentous  
74 ascomycetes are the major producers of secondary metabolites (e.g., penicillin, cyclosporin, etc.),  
75 with the majority of genes and gene clusters involved in fungal SM discovered in the subphylum  
76 Pezizomycotina (Collemare et al. 2008, Helaly et al. 2018). Although less than Ascomycota,  
77 Basidiomycota is also a prominent producer of SM, including some of the better-known  
78 hallucinogens (e.g., psilocybin of *Psilocybe*; Reynolds et al. 2018) and compounds toxic to  
79 humans (e.g., amanitin of *Amanita*; Luo et al. 2010).

80 For reasons that are unclear, the remainder of kingdom Fungi is characterized by a  
81 paucity of secondary metabolites (Voight et al. 2016). This includes the zoosporic fungi and  
82 relatives classified in Blastocladiomycota, Chytridiomycota and Rozellomycota, and the  
83 nonflagellated, zygomycete fungi of Mucoromycota and Zoopagomycota. This pattern of SM  
84 diversity supports the hypothesis that diversification of secondary metabolism is a characteristic  
85 of Ascomycota and Basidiomycota (subkingdom Dikarya), which share a more recent common  
86 ancestor relative to the other phyla. Recent genome sampling efforts have focused on increased  
87 sequencing of non-Dikarya species (Nagy et al. 2014, Kohler et al. 2015, Spatafora et al. 2016,  
88 Quandt et al. 2017, Ahrendt et al. 2018). These efforts have provided a better understanding of  
89 the relationships of the phyla of kingdom Fungi (e.g., Spatafora et al. 2016), and processes and  
90 patterns that shaped the evolution of morphologies (e.g., Nagy et al. 2014) and ecologies (e.g.,  
91 Chang et al. 2019, Quandt et al. 2017) within the kingdom. The availability of a diversity of  
92 these genomes provides an opportunity to characterize and focus on the secondary metabolism  
93 composition of non-Dikarya taxa, which have remained relatively unexplored.

94           While the majority of non-Dikarya taxa have low SM diversity, genomic sequencing of  
95 the genus *Basidiobolus* (Phylum Zoopagomycota) revealed that it possesses an unusually large  
96 composition of SM gene clusters. Species of *Basidiobolus* have complex life cycles, which  
97 produce multiple spore types that occur in multiple environmental niches. These species are  
98 symbionts found in the digestive tracts of reptiles and amphibians, but their function and impact  
99 on the host remains unknown. The fungus is dispersed with the feces where it sporulates  
100 producing both forcibly discharged asexual spores (blastoconidia) and passively dispersed  
101 asexual spores (capilloconidia) that adhere to exoskeletons of small insects. These insects are  
102 consumed by insectivorous amphibians, completing the life cycle. *Basidiobolus* also reproduces  
103 sexually through the production of zygospores (meiospores) either by selfing (homothallic) or  
104 outcrossing (heterothallic) according to species. The fungus is also isolated from leaf litter and  
105 can be maintained in pure culture, findings that are consistent with a saprobic (decomposition of  
106 organic matter) phase to the life cycle. *Basidiobolus* must have adapted for survival in numerous  
107 environmental niches including the amphibian digestive system, amphibian feces, insect  
108 phoresis, and on decaying plant matter or leaf litter.

109           In this study we demonstrate that the genomes of *Basidiobolus* contain a larger number of  
110 genes related to SM than predicted by phylogeny and that in several cases the evolution of many  
111 of these SM genes is inconsistent with vertical evolution. Our objectives were to: i) characterize  
112 the diversity of SM in *Basidiobolus*, ii) identify the phylogenetic sources of this diversity, and  
113 iii) determine which classes of SM gene clusters are functional and may predict the secondary  
114 metabolites produced by species of *Basidiobolus*. Finally, we propose a model in which the  
115 amphibian gastrointestinal system is an environment that promotes noncanonical evolution of its  
116 fungal inhabitants.

117  
118  
119

## Results

120 *Secondary metabolite gene cluster prediction.* – A total of 38 secondary metabolism (SM) gene  
121 clusters and 44 SM core genes were predicted in the *B. meristosporus* CBS 931.73 genome, 40  
122 SM gene clusters and 44 SM core genes for *B. meristosporus* B9252, and 23 SM gene clusters  
123 and 23 SM core genes for *B. heterosporus* B8920 (Table 1; Supplementary Table 2). Seventy-  
124 eight percent of the SM gene models predicted were found to be shared across the *Basidiobolus*  
125 isolates. Ten SM core genes were found to be unique to *B. meristosporus* CBS 931.73, 10 SM  
126 genes unique to *B. meristosporus* B9252, and 5 SM genes unique to *B. heterosporus* B8920  
127 (Additional file 1).

128 A total of 721 SM gene clusters were predicted for the 66 additional Mucoromycota and  
129 Zoopagomycota genomes including 74 non-ribosomal peptide synthetases (NRPS), 167 NRPS-  
130 like, 97 polyketide synthases (PKS), 91 PKS-like, 292 terpene cyclase (TC) gene models across  
131 both phyla (Figure 1, Supplementary Table 2). For Zoopagomycota (including *Basidiobolus*),  
132 284 SM gene models were predicted, including one NRPS-PKS hybrid, 71 NRPS, 56 NRPS-  
133 Like, 54 PKS, 46 PKS-Like, and 56 TC gene models. In Mucoromycota, 563 total SM gene  
134 models were predicted, including 45 NRPS, 142 NRPS-Like, 49 PKS, 51 PKS-Like, and 256 TC  
135 gene models. The three isolates with the most numerous predicted SM gene clusters, not  
136 including *Basidiobolus* genomes, were *Dimargaris cristalligena* RSA 468 with 33 predicted SM  
137 proteins (21 NRPS, 7 NRPS-Like, 2 PKS-Like, 3 TC), *Linderina pennispora* ATCC 12442 V 1.0  
138 with 23 SM predicted (1 NRPS, 15 PKS, 3 PKS-like, 4 TC), and *Martensiomycetes pterosporus*  
139 CBS 209.56 v1.0 with 23 SM proteins predicted (1 NRPS, 5 PKS, 14 PKS-Like, 3 TC). No  
140 DMAT gene models were predicted for any member of Mucoromycota or Zoopagomycota.

141  
142 *Expression of core SM genes in Basidiobolus.* – A total of 83.45% of the RNA sequenced reads  
143 were mapped uniquely to the reference genome of *B. meristosporus* CBS 931.73, while 12.08%  
144 of the reads were mapped in more than one location. Only 4.47% of the RNA sequenced reads  
145 did not map to the reference genome. The majority of predicted SM for *B. meristosporus* CBS  
146 931.73 were expressed at the same or higher levels than constitutive housekeeping genes, such as  
147 Beta-tubulin, Elongation Factor 1, Actin, and Ubiquitin (Figure 2). The highest expressed SM  
148 core genes per SM group were: NRPS – gene model 387529 (Cluster 5) with 74.03 transcripts  
149 per million (TPM) mapped; NRPS-like – gene model 221915 (Cluster 20) with 45.58 TPM  
150 mapped; PKS – gene model 290138 (Cluster 37) with 687.55 TPM mapped; PKS-like – gene  
151 model 207695 (Cluster 38) with 26.15 TPM mapped, and Terpene cyclase – gene model 301341  
152 (Cluster 13) with 78.26 TPM mapped.

153  
154 *Phylogenetic analysis of NRPS/NRPS-Like A-domains.* – The phylogenetic reconstruction of A-  
155 domains was performed with 951 A-domains from a combined dataset including the A-domain  
156 dataset from Bushley and Turgeon (2010) and the predictions of NRPS/NRPS-like A-domains  
157 from Mucoromycota and Zoopagomycota genome sequences (Additional file 2). A total of 395  
158 NRPS A-domains were predicted for *Basidiobolus*, Mucoromycota and Zoopagomycota genome  
159 sequences (Additional File 3). The phylogenetic analyses recovered the nine major families  
160 reported by Bushley and Turgeon (2010) with the addition of the two new clades, surfactin-like  
161 and ChNSP 12-11-like, reported here. The total number of Mucoromycota/Zoopagomycota A-  
162 domains and their distribution across these clades are as follows: 74 to the AAR clade; 115 to the  
163 major bacterial clade (MBC), including 104 A-domains with the surfactin-like clade with and an



164 additional 11 A-domains scattered elsewhere in the MBC; the CYCLO clade with eight A-  
165 domains; 65 A-domains to the ChNSP 12-11-like clade; 25 A-domains to the ChNSP 12-11  
166 clade; 11 A-domains to the PKS/NRPS clade; 16 A-domains to the SID clade; 76 A-domains to  
167 the SIDE clade; and 5 A-domains to the EAS clade (Figure 3). No A-domains were clustered  
168 into the ACV clade or the ChNSP 10 clade, and the remaining A-domains grouped within the  
169 outgroup clade (Figures 3 and 4, Supplementary Figure 1). Similar phylogenetic origins for  
170 multiple A-domains were found in a single NRPS core gene (Figure 4).

171       Of fungi classified in Mucoromycota or Zoopagomycota, *Basidiobolus* genomes  
172 contained the most A-domains clustered in the EAS, SIDE, and CYCLO clades. The A-domains  
173 clustered within EAS represent two domains from *B. meristosporus* CBS 931.73, and one A-  
174 domain of *Rhizophagus irregularis* DAOM 197198 v2.0. The A-domains clustered within SIDE  
175 represent 76 domains, 44 from *B. meristosporus* CBS 931.73, 19 from *B. meristosporus* B9252,  
176 and 13 from *B. heterosporus*. The A-domains clustered within the CYCLO clade represent six  
177 domains, four from *B. meristosporus* CBS 931.73 and two from *B. meristosporus* B9252. The  
178 NRPS A-domains grouped in the CYCLO cluster correspond to cluster 5 NRPS from *B.*  
179 *meristosporus* CBS 931.73 (Protein ID 387529) and cluster 9 of *B. meristosporus* B9252  
180 (Protein ID N161\_4477). Gene model 387529 was predicted as a tetra-modular protein, with two  
181 N-methyltransferase domains and a thioesterase domain. In addition, AntiSMASH analyses  
182 predict a six gene cluster (cluster 5) that includes gene model 387529, a zinc finger transcription  
183 factor (312194), carrier protein (277549), transporter (277552), peptidase (277554), and a  
184 SNARE associated protein (334759) (Supplementary Figure 2). All of these gene models have  
185 evidence of gene expression (Figure 2).

186           The *Basidiobolus* NRPS A-domains clustered in the surfactin-like clade included 32 A-  
187 domains from eight gene models from *B. meristosporus* CBS 931.73. These included gene  
188 model 375475 (Cluster 19) with eight A-domains, gene models 307892 (Cluster 33) and 343011  
189 (Cluster 35) with seven A-domains each; gene model 368581 (Cluster 8) with three A-domains;  
190 gene models 337511 (Cluster 16), 372991 (Cluster 17), and 298977 (Cluster 7) each with two A-  
191 domains; and gene model 322666 (Cluster 2) with one A-domain. *B. meristosporus* B9252  
192 contained two surfactin-like A-domains from one gene model (N161\_8304; Cluster 18). *B.*  
193 *heterosporus* possessed 13 A-domains from seven gene models, including N168\_07733 (Cluster  
194 6), N168\_06479 (Cluster 13), N168\_02885 (Cluster 1) and N168\_00034 (Cluster 14) with two  
195 A-domains each, and gene models N168\_05934 (Cluster 8), N168\_04239 (Cluster 12) and  
196 N168\_07140 (Cluster 9) with one A-domain each.

197  
198 *Evolutionary relationships of predicted PKSs.* – A total of 421 KS domains were included in the  
199 phylogenetic reconstruction (Additional File 4). Two KS domains were predicted from  
200 Chytridiomycota genomes, 21 from Neocallimastigomycota, 46 from Basidiomycota, 78 from  
201 Ascomycota, 54 from Mucoromycota, and 76 from Zoopagomycota for a total of 310 predicted  
202 fungal KS domains from genome sequences (Additional File 4). The additional KS domains  
203 were obtained from Kroken et al. (2003). For Mucoromycota and Zygomycota, the genomes with  
204 the highest number of KS domains were *Linderina pennispora* ATCC 12442 v1.0 (20 KS  
205 domains), *Coemansia spiralis* RSA 1278 v1.0 (11 KS domains), *Martensiomycetes pterosporus*  
206 CBS 209.56 v1.0 (10 KS domains), *Coemansia reversa* NRRL 1564 v1.0 (8 KS domains),  
207 *Coemansia mojavensis* RSA 71 v1.0 (7 KS domains), and the *Basidiobolus* genomes: *B.*

208 *meristosporus* CBS 931.73 (5 KS domains), *B. meristosporus* B9252 (4 KS domains), and *B.*  
209 *heterosporus* (3 KS domains).

210 Five major clades of PKS proteins were reported by Kroken et al. (2013) and recovered  
211 by this study, including the fungal reducing (R) PKS, animal fatty acid synthases (FAS), fungal  
212 non-reducing (NR) PKS, bacterial PKS, and fungal FAS (Supplementary Figures 3 and 4). The  
213 Fungal reducing PKS1 clade included domains from *B. meristosporus* CBS 931.73 (2 KS  
214 domains) and *B. meristosporus* B9252 (2 KS domains), as well as a new sub-clade called  
215 “reducing PKS clade V”. This clade comprised KS domains from Basidiomycota,  
216 Neocallimastigomycota and one Chytridiomycota representative. No KS domains of  
217 Mucoromycota or Zoopagomycota genomes were clustered within the animal FAS clade. The  
218 Fungal NR PKS clade contained a new clade, “non-reducing PKS proteins clade IV”, comprising  
219 KS domains from Basidiomycota, Neocallimastigomycota, and one KS domain of *B.*  
220 *meristosporus* B9252. The Bacterial PKS clustered KS domains from *B. meristosporus* CBS  
221 931.73 (1 KS domain) and *B. meristosporus* B9252 (1 KS domain) as sole representative of  
222 Mucoromycota and Zoopagomycota. Finally, the fungal FAS clade comprised all the remaining  
223 KS domains of Mucoromycota and Zoopagomycota genomes (Supplementary Figures 3 and 4).

224 To better understand the predicted PKSs of Mucoromycota and Zoopagomycota that  
225 clustered in the fungal FAS clade, the patterns of domains that comprise fungal PKS protein  
226 sequences were analyzed. Predicted PKS of Ascomycota contained AT, KS and PP domains in  
227 all sequences (Supplementary Figure 5). Predicted PKS from Basidiomycota contained AT and  
228 KS domains in all sequences, while KR and PP domains were present on 36% of the sequences.  
229 All PKS that contain a KS domain in the FAS clade are missing the PP domain. For  
230 Chytridiomycota, the predicted PKS with the KS domain clustered in the Fungal (R) clade

231 contained AT, KS and DH domains, but no PP domain. Chytridiomycota PKS with KS domains  
232 associated to FAS clade only possessed AT and KS domains. For Neocallimastigomycota, 100%  
233 of PKS clustered in fungal R and NR clades contained AT and KS domains, however, only 5  
234 PKS contained the PP domain. All Neocallimastigomycota PKS that clustered within the FAS  
235 clade contained only AT and KS domains. For Mucoromycota and Zoopagomycota, 100% of  
236 PKS contained either AT and/or KS domain, but no other domains (Supplementary Figure 6).

237  
238 *Evolutionary relationships of predicted terpene cyclase gene models.* – A total of 1,108 terpene  
239 cyclase or terpene cyclase-like gene models were identified and used for phylogenetic analyses  
240 (Additional file 5). These include 256 identified in the Mucoromycota species genomes, 56 in the  
241 Zoopagomycota genomes, and 401 ortholog proteins from 58 fungal genomes of Basidiomycota  
242 and Ascomycota. An additional 395 TC candidates were identified in bacterial genomes from  
243 RefSeq via BLASTP. The phylogenetic reconstruction of TC resulted in two main clades: an  
244 outgroup clade that comprised predicted TC annotated as tRNA threonylcarbamoyladenosine  
245 dehydratase and phytoene synthases, and a main ingroup TC core clade (Figure 5,  
246 Supplementary Figure 7). The tRNA threonylcarbamoyladenosine dehydratase subclade  
247 contained mostly bacterial sequences plus one TC gene model of *B. meristosporus* B9252 and *B.*  
248 *meristosporus* CBS 931.73 each. The phytoene synthases clade comprised two subclades, one  
249 clade that grouped most bacterial gene models, and a second clade clustering bacterial and  
250 Mucoromycota predicted TC gene models, but no *Basidiobolus* TC core gene models were found  
251 in this clade.

252 The TC core clade (Figure 5 and Supplementary Figure 7) comprised a bacterial  
253 exclusive clade (Bacteria I), followed by four highly supported sub-clades containing TC core

254 genes from Mucoromycota, Zoopagomycota, and Dikarya, and are referred to here as Fungi TC  
255 clades I – IV. The majority of TC genes from Mucoromycota and Zoopagomycota clustered  
256 within clade Fungi TC II, which included no other fungal or bacterial TC. These genes were  
257 annotated as Squalene synthetases by the *Mycocosm* genome portal.

258         The Fungi TC clades I, III and IV included mostly Mucoromycota TCs. The Fungi TC I  
259 clade contained TC genes from Mucoromycota isolates, as well as TC genes from the  
260 ascomycete isolates *Fusarium verticillioides* 7600 and *Hypoxylon sp.* EC38 v1.0, and the  
261 basidiomycete *Suillus luteus* UH-Slu-Lm8-n1 v2.0. These gene models were annotated as  
262 associated with the Ubiquitin C-terminal hydrolase UCHL1 according to the *MycoCosm* portal.  
263 Fungi TC III clade also comprised mostly Mucoromycota isolates, with additional TCs from  
264 Zoopagomycota isolates *Piptocephalis cylindrospora* RSA 2659 single-cell v3.0 and  
265 *Syncephalis pseudoplumigaleata* Benny S71-1 single-cell v1.0. Annotations of genes in Fungi  
266 TC III clade in *Mycocosm* indicated that these proteins are part of the isoprenoid/propenyl  
267 synthetases, responsible for synthesis of isoprenoids. Isoprenoids play a role on synthesis of  
268 various compounds such as cholesterol, ergosterol, dolichol, ubiquinone or coenzyme Q (Finn et  
269 al. 2009). Finally, Fungi TC IV clade followed a similar Mucoromycota-enriched pattern with  
270 the exceptions of *Dimargaris cristalligena* RSA 468 single-cell v1.0, *Linderina pennispora*  
271 ATCC 12442 v1.0, *M. pterosporus* CBS 209.56 v1.0, and *Syncephalis fuscata* S228 v1.0. Fungi  
272 TC IV clade also included TC genes from Ascomycete sequenced genomes. The majority of  
273 these genes were annotated as containing a terpene synthase family, metal binding domain, and a  
274 polyprenyl synthetase domain in the *MycoCosm* genome portal.

275         Within the fungal clades, the NADH dehydrogenase (ubiquinone) complex clade  
276 represented a highly supported clade clustering bacterial, Mucoromycota and Zoopagomycota

277 TCs. Annotations associated with gene models found in this clade indicated that this clade  
278 comprised TC associated to NADH dehydrogenase (ubiquinone) complex.

279 The terminal clades of TC clusters include the Bacteria II + *Basidiobolus* clade that  
280 included bacterial TC and six TC SM core genes predicted from *Basidiobolus* (two from each  
281 genome), and the clade comprising TC core genes solely from Dikarya and one gene from  
282 *Mortierella verticillata* NRRL 6337 and *Rhizopus microsporus* ATCC11559 v1.0 (Figures 5 and  
283 Supplementary Figure 7).

284  
285 *Signatures for HGT in Basidiobolus genomes.* – The identity search for genes with evidence for  
286 HGT identified 934 genes in *B. meristosporus* CBS 931.73, 620 genes of *B. meristosporus*  
287 B9252, and 382 genes of and *B. heterosporus* B8920 with zero BLASTP hits to fungal proteins.  
288 These genes were used for the coverage assay to identify gene model coverage deviation from  
289 the harboring scaffold median coverage (Sup. Fig. 7). This assay resulted in 810 genes of *B.*  
290 *meristosporus* CBS 931.73, 503 genes of *B. meristosporus* B9252, and 301 genes of and *B.*  
291 *heterosporus* B8920 with z-scores under 2 standard deviations from the harboring scaffold  
292 median coverage. These genes were considered candidate genes with evidence for HGT, and  
293 represented 5%, 4% and 3% of the gene content of *B. meristosporus* CBS 931.73, *B.*  
294 *meristosporus* B9252, and *B. heterosporus* B8920, respectively. The HGT candidates showed  
295 significant differences in GC content when contrasted to genes considered of fungal origin  
296 (Mean fungal GC content (expected) = 0.492, Mean HGT GC content (Observed) = 0.486, t =  
297 3.4119, df = 891.77, p-value = 0.0006741), but no differences in codon usage or 5-mer  
298 composition were detected between HGT candidate and fungal genes (Supplementary Figures 10  
299 and 11). Differences were also found for intron number and normalized intron length between

300 genes HGT candidate genes and fungal genes, where the distribution of intron number shows a  
301 median of 0 introns for HGT candidates and 2 for fungal genes (Kruskal-Wallis test;  $\chi^2=272.88$ ,  
302  $df = 1$ ,  $p\text{-value} < 2.2e-16$ ; Sup. Fig. 9). The majority of HGT candidate genes (61% of the genes)  
303 have no introns, compared to 36% of genes from fungal origin with no introns (Sup. Fig. 9). The  
304 candidate HGT genes have a significantly smaller normalized intron length than the genes with a  
305 fungal origin (Kruskal-wallis test;  $\chi^2=272.88$ ,  $df = 1$ ,  $p\text{-value} < 2.2e-16$ ).

306 A large percentage of SM core genes appeared to be the product of HGT from bacterial  
307 species into *Basidiobolus*. The SM core genes identified as candidate HGT genes is 61%, 44%  
308 and 52% for *B. meristosporus* CBS 931.73, *B. meristosporus* B9252, and *B. heterosporus*  
309 B8920, respectively (Table 2). NRPS/NRPS-like SM core genes represent the largest percentage  
310 of HGT evidence, while TC have the lowest percentage of HGT evidence (Table 2, Table 3).  
311 The identification of taxonomic sources for HGT into *Basidiobolus* indicated that most HGT  
312 comes from bacteria in the phylum Proteobacteria with 234, 160 and 95 gene models in *B.*  
313 *meristosporus* CBS 931.73, *B. meristosporus* B9252, and *B. heterosporus* B8920, respectively.  
314 Firmicutes (112, 63, and 39 gene models, respectively) and Actinobacteria (127, 67, and 40 gene  
315 models, respectively) (Figure 6, Supplementary Table 4) were the second and third most  
316 abundant source of HGT from bacteria into *Basidiobolus*.

317 Most HGT candidates genes resulted in no gene ontology (GO) annotation (659 gene  
318 models) or no InterPro domain annotation (140 gene models, Supplementary Table 5). The ten  
319 top GO terms were oxidation-reduction process (59 gene models), protein binding (34 gene  
320 models), phosphorelay sensor kinase activity (32 gene models), N-acetyltransferase activity (28  
321 gene models), catalytic activity (26 gene models), extracellular space (25 gene models),  
322 hydrolase activity (24 gene models), oxidoreductase activity (23 gene models), hydrolase activity



323 (24 gene models), hydrolyzing O-glycosyl compounds(23 gene models) , and NRPS (18 gene  
324 models) (Figure 6, Supplementary Table 5).

325  
326 *Siderophore activity in Basidiobolus meristosporus*. – The siderophore activity assay resulted in  
327 visible activity for the three replicates for *B. meristosporus* and *Cladosporium sp.*, and a small  
328 halo for one of the replicates of *C. thromboides*. No visible siderophore activity was detected for  
329 the other two replicates of *C. thromboides* or for the empty AY-CAS plates (Figure 7,  
330 Supplementary Figure 12). The analysis of variance for the area of siderophore activity measured  
331 showed significant differences across isolates/empty plates (ANOVA, F value = 19.62,  $p =$   
332 0.0004). Post-hoc tests showed no differences between *B. meristosporus* and *Cladosporium sp.*  
333 siderophore activity (Tukey HSD,  $p = 0.9801489$ ) nor between *C. thromboides* and the empty  
334 AY-CAS plates (Tukey HSD,  $p = 0.9396603$ ), but significant differences were found for all  
335 other comparisons (Tukey HSD,  $p < 0.001$  for all remaining comparisons).

336

## 337 **Discussion**

338

339 Secondary, or specialized, metabolite (SM) production is an important element of fungal  
340 metabolism. It has resulted in numerous natural products with human health implications, such  
341 as mycotoxins in our food supply, and medical applications, including antibiotics,  
342 immunosuppressants, and antitumor agents. The majority of the known genetic and chemical  
343 diversity of fungal SM has been described from the phyla Ascomycota and Basidiomycota with  
344 few SM gene clusters, and limited SM production, reported for fungi in Mucoromycota and  
345 Zoopagomycota. This observation has led to the dogma that ‘zygomycete’ species are



346 depauperate of these chemical pathways (Voight et al. 2016). Here we report gene clusters  
347 involved in SM production in the largest survey to date of Mucoromycota and Zoopagomycota  
348 species using genomics approaches and estimate the SM potential of these fungi.

349         Genome sequencing of a total of 69 isolates across diverse lineages of Mucoromycota  
350 and Zoopagomycota enabled detailed identification of SM clusters. These results support the  
351 hypothesis that zygomycete fungi have a low abundance of secondary metabolism (Figure 1,  
352 Supplementary Table 2) and agree with previous reports (Voight et al. 2016). Outliers to this  
353 pattern exist, however, and are particularly true of the genus *Basidiobolus* (Zoopagomycota),  
354 which possesses a large number of SM gene clusters predicted for the NRPS, PKS and TC  
355 families. This discovery of abundant candidate genes for production of secondary metabolite in  
356 *Basidiobolus* is novel and its presence is most consistent with a signal of horizontal gene transfer  
357 from bacteria to fungi, a phenomenon we propose is facilitated by living in the amphibian gut  
358 environment.

359  
360 *Distribution and Evolution of NRPS Genes Across Mucoromycota and Zoopagomycota.* – A  
361 deeper examination of *Basidiobolus* SM gene clusters indicates that this genus surpasses the  
362 number of expected NRPS genes for zygomycete species (Figure 1). Most of these SM genes  
363 also show evidence for transcription, indicating that the majority of these genes are expressed  
364 constitutively under laboratory conditions (Figure 2). Several of these core genes, such as the  
365 NRPS gene model 387529, appear to be expressed at a higher rate than several housekeeping  
366 genes.

367         A more detailed census of core genes reveals unique patterns of evolution of NRPS genes  
368 across Mucoromycota and Zoopagomycota when compared to Dikarya fungi (Figure 3, Table 1).

369 The only NRPS A-domains found throughout the two phyla are members of the AAR clade (with  
370 the exception of *Rhizopus delemar* 99-80). These A-domains are from the genes that encode  $\alpha$ -  
371 aminoadipate reductases (AAR), an enzyme responsible for the reduction of alpha-aminoadipic  
372 acid, which is essential for the lysine biosynthesis pathway and is present in all fungal phyla  
373 (Bushley and Turgeon 2010). In contrast, the remaining NRPS genes, and their respective A-  
374 domains, show discontinuous and patchy distributions across Mucoromycota and  
375 Zoopagomycota (Figure 3).

376 The most pronounced NRPS diversification in *Basidiobolus* are for genes that are  
377 predicted to encode for siderophores, iron chelating metabolites. A-domains for predicted  
378 siderophores are distributed throughout four clades including the three clades of major bacterial  
379 genes and the fungal SID and SIDE clades (Figure 3, Sup. Fig. 1). Major bacterial clades (MBC)  
380 exclusively comprise bacterial siderophore synthases, such as pyoverdine, yersiniabactin and  
381 pyochelin (Bushley and Turgeon 2010), with the exception of the surfactin-like clade. Our  
382 results show that genomes of *Mortierella* and *Basidiobolus* contain A-domains that are members  
383 of the MBC, and that they are the only fungal representatives of these clades. SID clade contains  
384 all NRPS associated with siderophore production from Ascomycota and Basidiomycota species.  
385 All *Basidiobolus* isolates contain one NRPS A-domain in this clade, as well as three A-domains  
386 from three NRPS gene models of *Conidiobolus coronatus* NRRL28638. Finally, SIDE, a clade  
387 comprising NRPS genes responsible for the production of siderophores in filamentous  
388 ascomycetes is expanded in *Basidiobolus* (Figure 3), which is also the only zygomycete with A-  
389 domains clustered in this clade. These findings are consistent with enrichment of both bacterial  
390 and fungal siderophores and are suggestive of the importance of iron metabolism in  
391 *Basidiobolus*.

392           The CYCLO clade contains the A-domains for core genes associated with biosynthesis of  
393 cyclic peptides, such as beauvericin and cyclosporin (Bushley and Turgeon 2010, Bushley et al  
394 2013). Sister to all other CYCLO clade A-domains are the A-domains that comprise the NRPS  
395 core gene model 387529 from *B. meristosporus* (Supplementary Figure 2). 387529 is expressed  
396 at the highest rate of any SM gene under laboratory conditions (Figure 2). It is annotated as a  
397 tetra-modular gene model, that includes two N-methylation domains, four adenylation domains,  
398 four condensation domains, and a TE domain. When compared to *simA*, the NRPS responsible  
399 for biosynthesis of cyclosporin, structural similarities can be found, such as the presence of the  
400 N-methylation domains and the TE terminator domain. Its phylogenetic and structural  
401 similarities to *simA* suggest that 387529 results in the synthesis of a cyclic peptide with  
402 methylated amino acid residues.

403           The surfactin-like clade contains A-domains for bacterial core genes with similarities,  
404 but not identical, to the *Bacillus subtilis* surfactin termination module (*srfA-C* gene; Peypoux et  
405 al. 1999) including the third, fourth and fifth A-domains of the five A-domain gene model  
406 NP\_930489.1 of *Photorhabdus luminescens* gene, two domains of the gene PvdD (AAX16295.1;  
407 pyoverdine synthetase) of *Pseudomonas aeruginosa*, and a single A-domain of the bimodular  
408 NRPS dbhF protein of *Bacillus subtilis* (AAD56240.1) which is involved in the biosynthesis of  
409 the siderophore bacillibactin. This surfactin-like clade contains eleven A-domains predicted from  
410 *Basidiobolus* genomes including the gene models 298977, 368581 and 372991 from *B.*  
411 *meristosporus* CBS 931.73. Gene model 298977 showed no evidence for gene expression, while  
412 gene models 368581 and 372991 show high rates of expression (Fig. 2). This is the first report of  
413 the prediction of a surfactin-like gene in fungi, but surfactant production was recently reported in  
414 *Mortierella alpina* (Baldeweg et al. 2019). These include malpinins, amphiphilic acetylated

415 hexapeptides that function as natural emulsifiers during lipid secretion, and malpibaldins,  
416 hydrophobic cyclopentapeptides. This finding is consistent with the genomic data and reveals  
417 that *Mortierella*, in addition to *Basidiobolus*, possesses homologs in the surfactin-like clade that  
418 are phylogenetically different from *B. subtilis* surfactins.

419 Surfactins, encoded by the *srfA* gene cluster in *Bacillus subtilis*, are functionally active as  
420 surfactants, as well as toxins and antibiotics. However, the surfactin genes from *B. subtilis* (SrfA-  
421 AA, SrfA-AB and SrfA-AC) were included in our analysis and clustered in a different clade  
422 within the MBC. A-domains from single module NRPS-like protein from *B. meristosporus* CBS  
423 931.73 (Gene model 146993) and from a NRPS-PKS hybrid A domain from of *B. meristosporus*  
424 B9252 (Gene model N161\_14278) clustered with the *B. subtilis* SrfA genes. The placement of  
425 this NRPS-PKS A-domain is interesting because surfactins are lipopeptides, which contain a  
426 hydrophobic fatty acid chain, whose biosynthesis is consistent with an NRPS-PKS hybrid. The  
427 A-domains from the remaining Mucoromycota and Zoopagomycota NRPS-PKS hybrids  
428 clustered as sister to the original clade of Dikarya NRPS-PKS hybrids, supporting the hypothesis  
429 of a single origin of fungal NRPS-PKS hybrids (Bushley and Turgeon 2010).

430  
431 *Mucoromycota and Zoopagomycota lack PKS diversity.* – Polyketide synthases (PKS) are  
432 abundant SM of Ascomycota and Basidiomycota and are involved in antibiotic production,  
433 carotenoid biosynthesis and other functional roles. In contrast, literature on PKS diversity for  
434 Mucoromycota and Zoopagomycota is limited. Our analyses update the phylogenetic  
435 reconstruction reported by Kroken et al. (2013) by adding genomic information from  
436 Chytridiomycota, Mucoromycota and Zoopagomycota (Supplementary Figures 3 and 4). Overall,  
437 we report the discovery of two new clades: A clade of non-reducing PKS proteins (clade IV)

438 comprising Neocastimastigomycota and Basidiomycota, and a reducing PKS clade (reducing  
439 PKS clade V) consisting of Neocastimastigomycota, Chytridiomycota and Basidiomycota. The  
440 results of our PKS prediction revealed a number of potential PKS core genes in zygomycete  
441 species (Supplementary Figures 3 and 4), but the results of our phylogenetic reconstruction show  
442 that the KS domain of the predicted PKS gene models are fungal fatty acid synthases (FAS).  
443 Only *Basidiobolus meristosporus* genomes possessed KS domains associated with fungal PKS,  
444 either reducing or non-reducing.

445 A domain-by-domain presence/absence analysis of PKS genes models (Supplementary  
446 Figures 5 and Figure 6) shows that in addition to AT and KT domains, a third domain (either  
447 KR, DH or PP) is found in the majority of fungal PKSs (Supplementary Figure 5). Conversely,  
448 the zygomycete genes in the FAS clade only possess the AT and/or KT domains, which are  
449 domains common between FAS and PKS, including the majority of PKSs predicted for  
450 *Basidiobolus*. However, *Basidiobolus* KS domains are found in both fungal and bacterial PKS  
451 clades. Gene models 292783 and 237744 from both isolates of *B. meristosporous* cluster with  
452 fungal reducing PKS II and possess the DH domain (Supplementary Figure 4), and the  
453 expression levels of 292783 is consistent with an actively transcribed gene (Figure 2).

454  
455 *Terpene cyclase-like genes are expanded in zygomycetes.* – Terpene cyclases (TC) are the most  
456 common SM predicted for zygomycete species (Figure 1, Supplementary Table 2). Phylogenetic  
457 reconstruction shows that zygomycete TC core genes are clearly distinct from Ascomycota and  
458 Basidiomycota TC, where at least 4 new clades of predominantly zygomycete TC are found  
459 (Figure 5, Supplementary Figure 7). Fungi II TC clade comprises TC from all zygomycete  
460 genomes analyzed with the exception of *Piptocephalis cylindrospora* RSA 2659 single-cell

461 v3.0, *Phycomyces blakesleeanus* NRRL1555 v2.0, and five genomes of *Rhizophagus irregularis*,  
462 which show no prediction of TC in their genomes. No Dikarya TC genes cluster within this  
463 clade. Fungi I, III and IV group TC genes are found almost exclusively in Mucoromycota  
464 species, as well as some Dikarya species. TC genes from Fungi I are present only in  
465 Mucoromycotina genomes. Functional annotations of TC genes from this clade indicate that  
466 these TC genes code for proteins associated with squalene and phytoene synthases and are part  
467 of the synthesis of carotenoids. Carotenoids are important compounds for the synthesis pathway  
468 of trisporic acid, the main molecule responsible for initiating sexual reproduction in zygomycetes  
469 (Burmester et al. 2007). Finally, *Basidiobolus* is the only non-Dikarya genus with TC genes  
470 clustered within the Bacteria II clade of TC. Both these SM core genes show evidence for  
471 expression comparable to housekeeping genes or other SM core genes (Figure 2). The presence  
472 of bacterial-like TC genes in *Basidiobolus* present more evidence on the plasticity of the genome  
473 of *Basidiobolus* and its ability to integrate and possibly express foreign SM associated DNA.

474  
475 *Horizontal Gene Transfer of SM genes to Basidiobolus?* – *Basidiobolus* is a genus with a  
476 complex biology, alternating ecologies, and multiple spore types. This complex biology is also  
477 reflected at the genomic scale. The sequenced genomes show a larger genome size than other  
478 zygomycetes, as well as a higher number of genes than any other Zoopagomycota genomes  
479 sequenced to date. Our SM prediction assay is concordant with these patterns in which  
480 *Basidiobolus* has an excess of SM gene clusters when compared to other zygomycetes. Evidence  
481 points to HGT as a main driver of SM diversity in *Basidiobolus* as supported by the phylogenetic  
482 reconstructions of NRPS, PKS and TC gene clusters with bacterial homologs. *Basidiobolus* and  
483 *Mortierella* are the only fungi with genes associated with the bacterial clades in each of these SM

484 phylogenetic reconstructions. Moreover, these HGT candidates are integrated into the  
485 *Basidiobolus* genome assembly and do not show evidence of artifactual assembly as evidenced  
486 by discontinuous coverage (Supplementary Figure 8). The most abundant functional group of  
487 SM core genes overall are siderophores and their overall functionality is supported by both the  
488 RNA expression analyses (Figure 2) and siderophore plate assays (Figure 7).

489         One stage of the *Basidiobolus* life cycle the fungus lives as a gut endosymbiont where it  
490 co-occurs with bacteria and other organisms that comprise the gut microbiome. Animal gut  
491 environments can facilitate HGT between bacteria and fungi, as previously reported for the  
492 zoosporic species of Neocallimastigomycetes (Chytridiomycota), which live in the ruminant gut  
493 environment and whose genomes exhibit a 2-3.5% frequency of genes with HGT evidence  
494 (Wang et al. 2018; Murphy et al. 2019). Phylogenomic analyses of the *Basidiobolus* NRPS A-  
495 domains support a phylogenetic affinity with A-domains from bacterial taxa and more rarely  
496 other fungi, a pattern most consistent with HGT. Our HGT survey comprised an extensive  
497 search of reference genomes across the tree of life available in NCBI RefSeq, as well as all of the  
498 gene models predicted for the Mucoromyocta and Zoopagomycota genomes. We find that 3% to  
499 5% of all predicted gene models present in *Basidiobolous* genomes are consistent with signatures  
500 of HGT from bacteria. However, the percentages radically change to 41% to 66% of predicted  
501 SM core gene models with bacterial HGT evidence. These SM gene models with bacterial  
502 signatures are highly abundant, with NRPS and NRPS-like genes comprising the top 25 ontology  
503 categories of HGT genes in *B. meristosporus* (Supplementary Table 5). These results are  
504 consistent with the life history of *Basidiobolus*, where the fungus lives in close proximity with  
505 other microorganisms associated with the amphibian gut environment.



506           The additional analyses to discover distinct genetic features for HGT candidates showed  
507 that the largest differences found are in intron number and intron length, but not in nucleotide  
508 composition or by codon usage. A significantly smaller number of introns and smaller  
509 normalized intron length in HGT candidates provide more support to the HGT hypothesis, where  
510 we expected that bacterially transferred genes would maintain a smaller number and length of  
511 introns. Intronic expansion of transferred genes into fungal species after an HGT event appears  
512 to be rapid in order to reflect the genetic makeup across the genome (Da Lage et al. 2013) and  
513 can explain the introns in some of the HGT candidates. However, up to 60% of the HGT  
514 candidates still maintain absence of introns as expected for genes of bacterial origin. Finally, the  
515 nucleotide composition of HGT candidates and fungal genes were indistinguishable. Reports  
516 show that foreign genes with similar codon usage are more likely to become fixed on the  
517 receiving genome (Medrano-Soto et al. 2004, Amorós-Montoya et al. 2010, Tuller 2011). We  
518 interpret these results to indicate that horizontally transferred genes are evolving towards a similar  
519 nucleotide composition of the fungal genome based on the 5-mer/codon usage assay, but still  
520 maintain high protein similarity to and group with donor lineage copy in phylogenetic  
521 reconstructions.

522           The taxonomic survey of our HGT analysis shows that a diverse array of bacteria may  
523 have consistently contributed genetic information into the *Basidiobolus* genomes (Figure 6 and  
524 Supplementary Table 4). The most abundant bacterial taxonomic groups associated with HGT  
525 are the Proteobacteria, Firmicutes, Actinobacteria/high GC gram positive bacteria, and  
526 Bacterioidetes (Figure 6, Supplementary Table 4). The proportion of HGT for each taxonomic  
527 group appears to be consistent among the three *Basidiobolus* genomes, and there are  
528 consistencies between the most common taxonomic groups responsible for HGT in *Basidiobolus*



529 and the reported composition of bacteria associated with the gut microbiome in amphibians  
530 (Bletz et al. 2016, Kohl et al. 2013) and reptiles (Colston and Jackson, 2016, Costello et al.  
531 2010).

532

### 533 **Conclusions**

534 Our results confirm that the majority of zygomycete fungi classified in Mucoromycota  
535 and Zoopagomycota do not possess a large genomic potential for secondary metabolism.  
536 Significant departures from this pattern exist, however, as exemplified by *Basidiobolus*, a genus  
537 with a complex genomic evolution and potential for considerable and diverse secondary  
538 metabolite production. First, it possesses larger than average genome with less than 8% content  
539 of repetitive regions, but a genetic plasticity to integrate and express extrinsic DNA. Second, the  
540 incorporation of extrinsic DNA is consistent with selection for increased SM production,  
541 especially gene models that are related to the capture of resources available in anaerobic  
542 conditions (iron chelation by siderophores) and metabolites that may play roles in antibiosis  
543 (surfactin-like genes) or host interaction. Third, the amphibian gut environment predisposes  
544 *Basidiobolus* to the acquisition of these SM core genes via HGT from co-inhabiting bacterial  
545 species. More information is needed to further test these hypotheses, including sequencing of  
546 additional *Basidiobolus* species with long read technologies; more accurate characterization of  
547 amphibian microbiomes that test positive for *Basidiobolus*; and LC-MSMS characterization of  
548 the *Basidiobolus* metabolome.

549

## 550 **Materials and Methods**

551

552 *Data collection.* – Annotated genome and amino-acid translation of predicted gene model  
553 sequences for three isolates of two species within the genus *Basidiobolus* were used in this  
554 study: *Basidiobolus meristosporus* CBS 931.73 (Mondo et al. 2017), isolated from gecko dung in  
555 the locality of Lamco, Ivory Coast; *B. meristosporus* B9252 (Chibucos et al. 2016) isolated from  
556 human eye in Saudi Arabia; and *B. heterosporus* B8920 (Chibucos et al. 2016) isolated from  
557 plant debris in India. The genomic sequence of *B. meristosporus* CBS 931.73 was sequenced  
558 with PacBio and annotated by Mondo et al. (2017) and obtained from the US Department of  
559 Energy Joint Genome Institute *Mycocosm* genome portal (<https://mycocosm.jgi.doe.gov>;  
560 Grigoriev et al. 2014). Genomic sequences and annotation of *B. meristosporus* B9252 and *B.*  
561 *heterosporus* B8920 sequenced by Chibucos et al. (2016) were obtained directly from the  
562 authors. The raw reads for these two species are available in GenBank (Accession numbers  
563 GCA\_000697375.1 and GCA\_000697455.1). Data sources for the remaining genomes included  
564 in these analyses are available in Supplementary Table 1.

565

566 *Secondary metabolite gene cluster prediction.* – Secondary Metabolite gene clusters for  
567 *Basidiobolus* species were predicted with AntiSMASH v4.2.0 (Weber et al. 2017) and the  
568 Secondary Metabolite Unique Regions Finder (SMURF; Khaldi et al. 2010) from the annotated  
569 genomes of the three isolates used in this study. The AntiSMASH prediction was performed on  
570 local HPC, while SMURF predictions were obtained by submission of the genomes the SMURF  
571 web server (<http://smurf.jcvi.org/>). Predictions were contrasted manually to determine shared  
572 clusters of secondary metabolites. Predicted SM proteins were retrieved for the genomes of 66  
573 additional Mucoromycota and Zoopagomycota species based on the SMURF predictions

574 available at *MycCosm* and by local prediction with AntiSMASH. Orthologous sets of core SM  
575 genes across *Basidiobolus* were identified using OrthoFinder (Emms et al. 2015).

576

577 *Secondary metabolite expression analysis.* – To assess the expression of predicted SM proteins  
578 in *B. meristosporus*, we calculated summarized counts of RNA transcript per million (TPM) for  
579 genes in *B. meristosporus* CBS 931.73 isolate by aligning RNA-Seq reads to the assembled *B.*  
580 *meristosporus* CBS 931.73 genome with HiSat v2.1.0 (Kim et al. 2019). The aligned sequence  
581 reads were processed with HTS-seq (Anders et al. 2014) to generate the counts of overlapping  
582 reads found for each gene and the normalized TPM for the genes was calculated using the cpm  
583 function in edgeR (Robinson et al. 2010). A distribution of RNA-Seq read counts per gene was  
584 plotted using the ggplot2 package in the R statistical framework (R Core Team 2018).

585

586 *Phylogenomic analyses.* – Phylogenetic analyses were used to assess the evolutionary  
587 relationships of the NRPS, PKS, and terpene cyclase/synthase predicted proteins. For the NRPS  
588 genes, the adenylation domains (A-domains) were identified by hmmsearch from HMMer 3.0  
589 suite (Eddy 2004), using the A-domain profile reported by Bushley and Turgeon (2010) as a  
590 reference profile HMM. The predicted A domains were extracted from the resulting HMMER  
591 table into a FASTA file using the esl-reformat program included in the HMMER suite. The  
592 predicted A-domains for all *Basidiobolus*, Mucoromycota and Zoopagomycota species were  
593 added to an A-domain amino-acid alignment reported by Bushley and Turgeon (2010) with  
594 MAFFT v7 (Katoh et al. 2017) (Additional file 1). This reference alignment contains A-domains  
595 from NRPS proteins from nine major subfamilies of fungal and bacterial NRPS proteins. The  
596 phylogenetic domain tree was constructed using a maximum likelihood approach implemented in

597 RAxML v. 8.2.11 (Stamatakis et al. 2014) with the JTT amino acid substitution matrix, after  
598 model selection using the PROTGAMMAAUTO option, and 1000 bootstrap replicates  
599 (raxmlHPC-PTHREADS -T 12 -n NRPS -s infile.fasta -f a -x 12345 -p 12345 -m PROTCATJTT  
600 -N 1000). A graphical representation of the A-domains from the NRPS/NRPS-like core gene  
601 models (Fig. X) was constructed by coloring the A-domain position in the core gene according to  
602 its phylogenetic origin using the ggplot2 R package (Wickham, 2016).

603 For the PKS genes, the KS domains of all predicted PKS proteins from the *Basidiobolus*,  
604 Mucoromycota and Zoopagomycota species were identified using hmmsearch, using the KS  
605 domain profile (PF001009) available in PFAM v31 (Finn et al. 2009). The predicted KS domains  
606 for all *Basidiobolus*, Mucoromycota and Zoopagomycota species were added to an existing KS  
607 domain amino-acid alignment reported by Kroken et al. (2003) using MAFFT v7 (Katoh et al.  
608 2017) (Additional file 2). This existing alignment contained KS domains from PKS proteins  
609 from reduced and unreduced PKS from bacterial and fungal species. The Kroken et al. (2003)  
610 database was expanded by adding predicted KS domains from PKS proteins of additional  
611 published fungal genomes in order to include more fungal diversity in the dataset: Eight  
612 Ascomycota isolates (*Aspergillus nidulans* FGSC A4, *Beauveria bassiana* ARSEF 2860,  
613 *Capronia coronata* CBS 617.96, *Capronia semiimmersa* CBS 27337, *Cladophialophora*  
614 *bantiana* CBS 173.52, *Cochliobolus victoriae* FI3 v1.0, *Microsporium canis* CBS 113480,  
615 *Trichoderma atroviride* v2.0), nine Basidiomycota isolates (*Acaromyces ingoldii* MCA 4198  
616 v1.0, *Fibroporia radiculosa* TFFH 294, *Fomitiporia mediterranea* v1.0, *Gloeophyllum trabeum*  
617 v1.0, *Gymnopus luxurians* v1.0, *Laccaria bicolor* v2.0, *Microbotryum lychnidis–dioicae* p1A1  
618 Lamole, *Piloderma croceum* F 1598 v1.0, *Pisolithus tinctorius* Marx 270 v1.0), four  
619 Neocallimastigomycota isolates (*Anaeromyces robustus* v1.0, *Orpinomyces* sp., *Piromyces finnis*

620 v3.0, *Piromyces sp. E2* v1.0) and one Chytridiomycota species (*Spizellomyces punctatus* DAOM  
621 BR117). The predicted PKS proteins from additional species were all obtained from the DOE-  
622 JGI *Mycocosm* genome portal by searching for all genes with “PKS” on the SM annotation from  
623 *Mycocosm*. The KS domains were identified for the subset of PKS proteins using a HMMER KS  
624 profile as mentioned above. A phylogenetic tree was reconstructed using maximum likelihood  
625 using all KS domains using similar parameters described in the NRPS step.

626         The terpene cyclase (TC) proteins were predicted in AntiSMASH for all 69 assembled  
627 genome sequences from *Basidiobolus*, Mucoromycota and Zoopagomycota. To include  
628 additional fungal TC proteins in the phylogenetic reconstruction, we identified TC proteins from  
629 58 published genomes of Dikarya isolates (21 Basidiomycetes and 37 Ascomycetes) available in  
630 DOE-JGI *Mycocosm*, each from a different family (Supplementary Table 3). One isolate per  
631 family was randomly selected for the analysis. To screen for TC proteins in Dikarya,  
632 OrthoFinder was used to build orthologous clusters of genes between *Basidiobolus*,  
633 Mucoromycota and Zoopagomycota TC and the Dikarya proteome dataset. Dikarya proteins  
634 clustered within orthologous groups that contain TC of *Basidiobolus*, Mucoromycota and  
635 Zoopagomycota were considered valid TC orthologs and used in downstream analyses. Finally,  
636 we identified bacterial TC to evaluate the potential for HGT into *Basidiobolus*, Mucoromycota or  
637 Zoopagomycota species. Bacterial TC's were identified by screening each protein from the  
638 RefSeq, release 87 (May 2018, O'Leary et al. 2016) FASTA dataset against a BLAST database  
639 (Altschul et al. 1997), one from each of the zygomycete orthologous groups identified by  
640 OrthoFinder in the previous step, for a total of four protein sequences in the database. The  
641 BLASTP program was used to perform the searches, using an e-value of  $1e^{-10}$  and the  
642 BLOSUM62 substitution matrix. Positive matches from the BLASTP assay were used as

643 bacterial TC for subsequent analyses. A multi-sequence alignment containing all predicted TC  
644 from *Basidiobolus*, Mucoromycota and Zoopagomycota species, the orthologous TC from  
645 additional fungal species, and the TC proteins from reference bacterial predicted gene models  
646 result of the BLASTP search was performed in MAFFT v7 using the G-INS-1 algorithm for  
647 progressive global alignment (Kato et al. 2017) (Additional file 3). A phylogenetic tree was  
648 reconstructed using maximum likelihood in RAxML using similar parameters as mentioned  
649 before.

650

651 *Horizontal gene transfer in Basidiobolus species.* – Identification of genic regions with evidence  
652 for horizontal gene transfer (HGT) from bacteria was performed by searching all translated  
653 proteins from the predicted gene models of the *Basidiobolus* isolates against a custom BLAST  
654 protein database. This database included all amino-acid sequences available in the NCBI RefSeq  
655 proteomics database and all available amino-acid sequences for Mucoromycota and  
656 Zoopagomycota species at the DOE-JGI *Mycocosm* genome portal. The proteins were searched  
657 with BLASTP against the combined RefSeq/Mucoromycota/Zoopagomycota custom database,  
658 using an e-value cutoff of  $1e^{-10}$  and the BLOSUM62 substitution matrix. A summary of the  
659 taxonomy identifier for all best hits was obtained by identifying whether the best hit was a  
660 Mucoromycota/Zoopagomycota protein, or a RefSeq protein. We used the rentrez package  
661 (Winter, 2017) in the R statistical framework to extract the top-ten taxonomic identifiers from  
662 the NCBI database when hits did not correspond to Mucoromycota/Zoopagomycota. Proteins  
663 that had no hits to a fungal protein and only hits to a bacterial protein were considered candidate  
664 HGT genes.

665 To increase the accuracy of the prediction of genes product of HGT, we tested whether  
666 HGT candidate genes showed signs of errant assembly or in silica incorporation into the  
667 *Basidiobolus* genomes. The mean genomic read coverage of each candidate gene was calculated  
668 and compared to the mean coverage of the scaffold harboring the HGT candidate gene for all  
669 three *Basidiobolus* isolates. A z-score was calculated in R to determine the number of standard  
670 deviations of the HGT candidate from the mean coverage of the harboring scaffold. All HGT  
671 candidates with standard deviations greater or less than two were removed from the analysis.  
672 The genomic reads were mapped to each reference genome using BWA (Li and Durbin, 2009).  
673 Coverage per HGT and harboring scaffold was estimated using samtools (Li et al. 2009). A  
674 summary plot of the proportion of genes with bacterial best hits was constructed using the  
675 ggplot2 package in R.

676 To identify differences in the GC content between HGT candidates and genes of fungal  
677 origin, a paired t-test was performed between the mean GC content for HGT candidates and  
678 fungal genes for the predicted genes of *Basidiobolus meristosporus* CBS 931.73 as this species  
679 has the genome with longest contigs and best assemblies overall. In addition, to identify if the  
680 HGT candidate genes had a reduced number of introns than the fungal genes, a summary of the  
681 number of introns and normalized intron length (intron length divided by gene model length) was  
682 performed in the GenomicRanges R package (Lawrence et al. 2013). A Kruskal-Wallis test was  
683 performed in R to identify significant differences in the number of introns and the normalized  
684 intron length for the HGT candidates and the fungal genes. A nucleotide composition analysis  
685 based on 5-mers and codon usage was performed to observe differences between candidate HGT  
686 genes and fungal genes for *Basidiobolus meristosporus* CBS 931.73. The 5-mer analysis was  
687 conducted in all predicted coding sequences from the annotated gene models using the



688 oligonucleotideFrequency function of the Biostring R package (Pagès et al. 2019). Codon usage  
689 was estimated using the uco function of the seqinr R package (Charif and Lobry 2007). Both  
690 these indices were divided by gene length to normalize the nucleotide composition by the effect  
691 of gene length. Principal component analyses were performed in R for both 5-mer and codon  
692 usage analysis to compare the HGT candidates to the fungal candidate genes. Lastly, the putative  
693 functions of the genes with evidence for HGT were summarized using the functional annotations  
694 available in the gene format file (GFF) of *B. meristosporus* CBS 931.73.

695  
696 *Measuring siderophore activity in Basidiobolus.* – To measure the siderophore activity (chelation  
697 of ferric ions) of *Basidiobolus*, an assay of detection of siderophore activity based on the  
698 universal chrome azurol S (CAS) assay (Andrews et al. 2016) was performed for the strain  
699 *Basidiobolus meristosporus* CBS 931.73. This colorimetric assay uses a complex of Fe(III) –  
700 CAS – DDAPS (Surfactant). When this complex is combined with acetate yeast agar (AY agar),  
701 it results in a greenish-blue color, where the color changes to yellow upon the removal of the  
702 iron. A total of 450 ml of AY agar (Andrews et al. 2016) was mixed with 50 ml of autoclaved  
703 10X CAS assay (20 ml of 10 mM Fe(NO<sub>3</sub>)<sub>3</sub>, 40 ml of 10 mM chrome azurol S, and 100 ml of 10  
704 mM DDAPS). A 10 cm layer of the AY-CAS media was poured in small petri dishes and cooled.  
705 An upper layer of 10 cm of AY agar was poured after cooling, and the media was left to diffuse  
706 overnight and stored at 4°C for 24 hours. *B. meristosporus*, *Conidiobolus thromboides* FSU 785  
707 (negative control), and *Cladosporium sp.* from the *herbarum* species complex PE-07 (positive  
708 control) were transferred into the AY-CAS plates by transferring a small amount of mycelium  
709 via a sterile toothpick and piercing the media in the center. The assay was performed in triplicate  
710 for each isolate used. Cultures were grown at room temperature for 12 days. Siderophore activity



711 was measured as the area of the plate that has changed to yellow color, when compared to a  
712 negative control and an empty petri dish with AY-CAS agar. Pictures of the plates were taken.  
713 These images were imported into Adobe Photoshop CC 2019 and size-corrected to 5.5 cm  
714 (diameter of the small petri dish). All images were concatenated in the same file. The Color  
715 Range tool of Adobe Photoshop CC tool was used to measure the yellow area for all plates. The  
716 area measurements were exported into R, where an analysis of variance was performed to  
717 determine significant differences across the siderophore activity of the strains.

718

#### 719 **Data availability**

720 All additional files included as supplementary materials in this manuscript and custom  
721 scripts used for this analysis can be found in the ZyGoLife GitHub repository  
722 ([https://github.com/zygolife/Basidiobolus\\_SM\\_repo](https://github.com/zygolife/Basidiobolus_SM_repo)).

723

#### 724 **Acknowledgments**

725

726 We would like to thank Dr. Vincent Bruno and Dr. Ashraf S. Ibrahim for kindly sharing the files  
727 of the genome annotation, assembly and gene predictions of *B. meristosporus* B9252 and *B.*  
728 *heterosporus* B8920; Dr. Marc Cubeta and Dr. Gregory Bonito for discussions and  
729 recommendations for additional experiments regarding siderophore assays and surfactin-like  
730 genes; Dr. Gregory Bonito for allowing us to use the unpublished genome sequences of  
731 *Mortierella humilis* PMI\_1414, *Mortierella* sp. GBAus27b; Dr. Olafur S. Andr sson for  
732 allowing us to use the unpublished genome sequences of *Lobaria pulmonaria*; Dr. Paul Dryer for  
733 allowing us to use the unpublished genome sequence of *Xanthoria parietina* 46-1-SA22; Dr.  
734 Francis Martin and Dr. Pierre Gladieux for allowing us to use the unpublished genome sequence

735 of *Achaetomium strumarium* CBS333.67; Dr. Francis Martin for allowing us to use the  
736 unpublished genome sequences of *Boletus edulis* VI and *Amylostereum chailletii* DWAch2; Dr.  
737 Marie-Noëlle Rosso for allowing us to use the unpublished genome sequences of  
738 *Abortiporus biennis* CIRM-BRFM1778; Dr. Francis Martin and Dr. Gregory Bonito for allowing  
739 us to use the unpublished genome sequence of *Atractiellales rhizophila* v2.0; the 1000 Fungal  
740 Genomes Project for the use of the dikarya unpublished genomes; and Sabrina Heitmann, Dr. Ed  
741 Barge, Dr. Devin Leopold and Dr. Posy Busby for the *Cladosporium* sp. from the *herbarum*  
742 species complex PE-07 sample. This work was supported by the National Science Foundation  
743 (DEB-1441604 to JWS; DEB-1557110 and DEB-1441715 to JES). The work conducted by the  
744 U.S. Department of Energy Joint Genome Institute, a DOE Office of Science User Facility, is  
745 supported by the Office of Science of the U.S. Department of Energy under Contract No. DE-  
746 AC02-05CH11231. Any opinions, findings, and conclusions or recommendations expressed in  
747 this material are those of the author(s) and do not necessarily reflect the views of the National  
748 Science Foundation.  
749

750 **References**

- 751 Altschul, S.F., Madden, T.L., Schäffer, A.A., Zhang, J., Zhang, Z., Miller, W. and  
752 Lipman, D.J., 1997. Gapped BLAST and PSI-BLAST: a new generation of protein database  
753 search programs. *Nucleic Acids Research*, 25(17), pp.3389-3402.
- 754 Amorós-Moya, D., Bedhomme, S., Hermann, M. and Bravo, I.G., 2010. Evolution in  
755 regulatory regions rapidly compensates the cost of nonoptimal codon usage. *Molecular Biology  
756 and Evolution*, 27(9), pp.2141-2151.
- 757 Anders, S., Pyl, P.T. and Huber, W., 2015. HTSeq—a Python framework to work with  
758 high-throughput sequencing data. *Bioinformatics*, 31(2), pp.166-169.
- 759 Andrews, M. Y., Santelli, C. M., & Duckworth, O. W. 2016. Layer plate CAS assay for  
760 the quantitation of siderophore production and determination of exudation patterns for fungi.  
761 *Journal of Microbiological Methods*, 121(C), pp. 41–43.  
762 <http://doi.org/10.1016/j.mimet.2015.12.012>
- 763 Ahrendt, S.R., Quandt, C.A., Ciobanu, D., Clum, A., Salamov, A., Andreopoulos, B.,  
764 Cheng, J.F., Woyke, T., Pelin, A., Henrissat, B. and Reynolds, N.K., 2018. Leveraging single-  
765 cell genomics to expand the fungal tree of life. *Nature Microbiology*, 3(12), p.1417.
- 766 Armaleo, D., Müller, O., Lutzoni, F., Andrésson, Ó.S., Blanc, G., Bode, H.B., Collart,  
767 F.R., Dal Grande, F., Dietrich, F., Grigoriev, I.V. and Joneson, S., 2019. The lichen symbiosis  
768 re-viewed through the genomes of *Cladonia grayi* and its algal partner *Asterochloris glomerata*.  
769 *BMC genomics*, 20(1), p.605  
770

- 771 Baldeweg, F., Warncke, P., Fischer, D. and Gressler, M., 2019. Fungal Biosurfactants  
772 from *Mortierella alpina*. *Organic Letters*, 21(5), pp.1444-1448.
- 773 Bletz, M.C., Goedbloed, D.J., Sanchez, E., Reinhardt, T., Tebbe, C.C., Bhujji, S., Geffers,  
774 R., Jarek, M., Vences, M. and Steinfartz, S., 2016. Amphibian gut microbiota shifts differentially  
775 in community structure but converges on habitat-specific predicted functions. *Nature*  
776 *Communications*, 7, p.13699.
- 777 Blin, K., Wolf, T., Chevrette, M.G., Lu, X., Schwalen, C.J., Kautsar, S.A., Suarez Duran,  
778 H.G., de Los Santos, E.L., Kim, H.U., Nave, M. and Dickschat, J.S., 2017. antiSMASH 4.0—  
779 improvements in chemistry prediction and gene cluster boundary identification. *Nucleic Acids*  
780 *Research*, 45(W1), pp.W36-W41.
- 781 Brakhage, A.A., 2013. Regulation of fungal secondary metabolism. *Nature Reviews*  
782 *Microbiology*, 11(1), p.21.
- 783 Braun V., Hantke K. (2013) The Tricky Ways Bacteria Cope with Iron Limitation. In:  
784 Chakraborty R., Braun V., Hantke K., Cornelis P. (eds) Iron Uptake in Bacteria with Emphasis  
785 on *E. coli* and *Pseudomonas*. SpringerBriefs in Molecular Science. Springer, Dordrecht
- 786 Burmester, A., Richter, M., Schultze, K., Voelz, K., Schachtschabel, D., Boland, W.,  
787 Wöstemeyer, J. and Schimek, C., 2007. Cleavage of  $\beta$ -carotene as the first step in sexual  
788 hormone synthesis in zygomycetes is mediated by a trisporic acid regulated  $\beta$ -carotene  
789 oxygenase. *Fungal Genetics and Biology*, 44(11), pp.1096-1108.
- 790 Burmester, A., Shelest, E., Glöckner, G., Heddergott, C., Schindler, S., Staib, P., Heidel,  
791 A., Felder, M., Petzold, A., Szafranski, K. and Feuermann, M., 2011. Comparative and

- 792 functional genomics provide insights into the pathogenicity of dermatophytic fungi. *Genome*  
793 *biology*, 12(1), p.R7
- 794 Bushley, K.E. and Turgeon, B.G., 2010. Phylogenomics reveals subfamilies of fungal  
795 nonribosomal peptide synthetases and their evolutionary relationships. *BMC Evolutionary*  
796 *Biology*, 10(1), p.26.
- 797 Bushley, K.E., Raja, R., Jaiswal, P., Cumbie, J.S., Nonogaki, M., Boyd, A.E., Owensby,  
798 C.A., Knaus, B.J., Elser, J., Miller, D. and Di, Y., 2013. The genome of *Tolypocladium inflatum*:  
799 evolution, organization, and expression of the cyclosporin biosynthetic gene cluster. *PLoS*  
800 *genetics*, 9(6).
- 801 Capella-Gutiérrez, S., Silla-Martínez, J.M. and Gabaldón, T., 2009. trimAl: a tool for  
802 automated alignment trimming in large-scale phylogenetic analyses. *Bioinformatics*, 25(15),  
803 pp.1972-1973.
- 804 Chang, Y., Wang, S., Sekimoto, S., Aerts, A.L., Choi, C., Clum, A., LaButti, K.M.,  
805 Lindquist, E.A., Yee, Ngan C., Ohm, R.A., Salamov, A.A., Grigoriev, I.V., Spatafora, J.W., and  
806 Berbee M.L. 2015. Phylogenomic Analyses Indicate that Early Fungi Evolved Digesting Cell  
807 Walls of Algal Ancestors of Land Plants. *Genome Biology and Evolution*, 14;7(6):1590-601. doi:  
808 10.1093/gbe/evv090.
- 809 Chang, Y., Desirò, A., Na, H., Sandor, L., Lipzen, A., Clum, A., Barry, K., Grigoriev,  
810 I.V., Martin, F.M., Stajich, J.E. and Smith, M.E., 2019. Phylogenomics of Endogonaceae and  
811 evolution of mycorrhizas within Mucoromycota. *New Phytologist*, 222(1), pp.511-525.

812 Charif, D. and Lobry, J.R., 2007. SeqinR 1.0-2: a contributed package to the R project for  
813 statistical computing devoted to biological sequences retrieval and analysis. In Structural  
814 approaches to sequence evolution (pp. 207-232). Springer, Berlin, Heidelberg.

815 Chen, E.C.H., Morin, E., Beaudet, D., Noel, J., Yildirim, G., Ndikumana, S., Charron, P.,  
816 St-Onge, C., Giorgi J., Kruger, M., Marton, T., Ropars, J., Grigoriev, I.V., Hainaut, M.,  
817 Henrissat, B., Roux, C., Martin, F. and Corradi, N. 2018. High intraspecific genome diversity in  
818 the model arbuscular mycorrhizal symbiont *Rhizophagus irregularis*. *New Phytologist*,  
819 220(4):1161-1171. doi: 10.1111/nph.14989.

820 Chibucos, M.C., Soliman, S., Gebremariam, T., Lee, H., Daugherty, S., Orvis, J., Shetty,  
821 A.C., Crabtree, J., Hazen, T.H., Etienne, K.A. and Kumari, P., 2016. An integrated genomic and  
822 transcriptomic survey of mucormycosis-causing fungi. *Nature Communications*, 7, p.12218.

823 Collemare, J., Pianfetti, M., Houille, A.E., Morin, D., Camborde, L., Gagey, M.J.,  
824 Barbisan, C., Fudal, I., Lebrun, M.H. and Böhnert, H.U., 2008. Magnaporthe grisea avirulence  
825 gene ACE1 belongs to an infection-specific gene cluster involved in secondary metabolism.  
826 *New Phytologist*, 179(1), pp.196-208.

827 Colston, T.J. and Jackson, C.R., 2016. Microbiome evolution along divergent branches of  
828 the vertebrate tree of life: what is known and unknown. *Molecular Ecology*, 25(16), pp.3776-  
829 3800.

830 Corrochano, L.M., Kuo, A., Marcet-Houben, M., Polaino, S., Salamov, A., Villalobos-  
831 Escobedo, J.M., Grimwood, J., Alvarez, M.I., Avalos, J., Bauer, D., Benito, E.P., Benoit, I.,  
832 Burger, G., Camino, L.P., Canovas, D., Cerda-Olmedo, E., Cheng, J.F., Dominguez, A., Elias,  
833 M., Eslava, AP., Glaser, F., Gutierrez, G., Heitman, J., Henrissat, B., Iturriaga, E.A., Lang, B.F.,

834 Lavin, J.L., Lee, S.C., Li, W., Lindquist, E., Lopez-Garcia, S., Luque, E.M., Marcos, A.T.,  
835 Martin, J., McCluskey, K., Medina, H.R., Miralles-Duran, A., Miyazaki, A., Munoz-Torres, E.,  
836 Oguiza, J.A., Ohm, R.A., Olmedo, M., Oreja, s M., Ortiz-Castellanos, L., Pisabarro, A.G.,  
837 Rodriguez-Romero, J., Ruiz-Herrera, J., Ruiz-Vazquez, R., Sanz, C., Schackwitz, W., Shahriari,  
838 M., Shelest, E., Silva-Franco, F., Soanes, D., Syed, K., Tagua, V.G., Talbot, N.J., Thon, M.R.,  
839 Tice, H., de Vries, R.P., Wiebenga, A., Yadav, J.S., Braun, E.L., Baker, S.E., Garre, V.,  
840 Schmutz, J., Horwitz, B.A., Torres-Martinez, S., Idnurm, A., Herrera-Estrella, A., Gabaldon and  
841 T., Grigoriev, I.V. 2016. Expansion of Signal Transduction Pathways in Fungi by Extensive  
842 Genome Duplication. *Current Biology*, 26(12):1577-1584. doi: 10.1016/j.cub.2016.04.038.

843 Costello, E.K., Gordon, J.I., Secor, S.M. and Knight, R., 2010. Postprandial remodeling  
844 of the gut microbiota in Burmese pythons. *The ISME journal*, 4(11), p.1375.

845 Da Lage, J.L., Binder, M., Hua-Van, A., Janeček, Š. and Casane, D., 2013. Gene make-  
846 up: rapid and massive intron gains after horizontal transfer of a bacterial  $\alpha$ -amylase gene to  
847 Basidiomycetes. *BMC evolutionary biology*, 13(1), p.40.

848 DiGuistini, S., Wang, Y., Liao, N.Y., Taylor, G., Tanguay, P., Feau, N., Henrissat, B.,  
849 Chan, S.K., Hesse-Orce, U., Alamouti, S.M. and Tsui, C.K., 2011. Genome and transcriptome  
850 analyses of the mountain pine beetle-fungal symbiont *Grosmannia clavigera*, a lodgepole pine  
851 pathogen. *Proceedings of the National Academy of Sciences*, 108(6), pp.2504-2509.

852 Dimkpa, C., 2016. Microbial siderophores: Production, detection and application in  
853 agriculture and environment. *Endocytobiosis & Cell Research*, 27(2), pp. 7-16

854 Eddy, S.R., 2004. What is a hidden Markov model?. *Nature Biotechnology*, 22(10),  
855 p.1315.

- 856 Emms, D.M. and Kelly, S., 2015. OrthoFinder: solving fundamental biases in whole  
857 genome comparisons dramatically improves orthogroup inference accuracy. *Genome Biology*,  
858 *16*(1), p.157.
- 859 Finn, R.D., Mistry, J., Tate, J., Coggill, P., Heger, A., Pollington, J.E., Gavin, O.L.,  
860 Gunasekaran, P., Ceric, G., Forslund, K. and Holm, L., 2009. The Pfam protein families  
861 database. *Nucleic Acids Research*, *38*(suppl\_1), pp.D211-D222.
- 862 Floudas, D., Binder, M., Riley, R., Barry, K., Blanchette, R.A., Henrissat, B., Martínez,  
863 A.T., Otiillar, R., Spatafora, J.W., Yadav, J.S. and Aerts, A., 2012. The Paleozoic origin of  
864 enzymatic lignin decomposition reconstructed from 31 fungal genomes. *Science*, *336*(6089),  
865 pp.1715-1719.
- 866 Ffrench-Constant, R.H., Waterfield, N., Burland, V., Perna, N.T., Daborn, P.J., Bowen,  
867 D. and Blattner, F.R., 2000. A genomic sample sequence of the entomopathogenic bacterium  
868 *Photorhabdus luminescens* W14: potential implications for virulence. *Applied Environmental*  
869 *Microbiology*, *66*(8), pp.3310-3329.
- 870 Gaillard DL (2014) Population genetics and microbial communities of the Gopher  
871 Tortoise (*Gopherus polyphemus*). Unpublished MS Thesis, The University of Southern  
872 Mississippi.
- 873 Gawad, C., Koh, W. and Quake, S.R., 2016. Single-cell genome sequencing: current state  
874 of the science. *Nature Reviews Genetics*, *17*(3), p.175.
- 875 Gostinčar, C., Ohm, R.A., Kogej, T., Sonjak, S., Turk, M., Zajc, J., Zalar, P., Grube, M.,  
876 Sun, H., Han, J. and Sharma, A., 2014. Genome sequencing of four *Aureobasidium pullulans*



- 877 varieties: biotechnological potential, stress tolerance, and description of new species. *BMC*  
878 *genomics*, 15(1), p.549.
- 879 Grigoriev IV, Nikitin R, Haridas S, Kuo A, Ohm R, Otilar R, Riley R, Salamov A, Zhao  
880 X, Korzeniewski F, Smirnova T, Nordberg H, Dubchak I, Shabalov I., 2014. MycoCosm portal:  
881 gearing up for 1000 fungal genomes. *Nucleic Acids Res.* 42(1):D699-704.
- 882 Haridas, S., Albert, R., Binder, M., Bloem, J., LaButti, K., Salamov, A., Andreopoulos,  
883 B., Baker, S.E., Barry, K., Bills, G. and Bluhm, B.H., 2020. 101 Dothideomycetes genomes: a  
884 test case for predicting lifestyles and emergence of pathogens. *Studies in Mycology*.  
885 <https://doi.org/10.1016/j.simyco.2020.01.003>
- 886 Helaly, S.E., Thongbai, B. and Stadler, M., 2018. Diversity of biologically active  
887 secondary metabolites from endophytic and saprotrophic fungi of the ascomycete order  
888 Xylariales. *Natural Product Reports*, 35(9), pp.992-1014.
- 889 Hong, P.Y., Wheeler, E., Cann, I.K. and Mackie, R.I., 2011. Phylogenetic analysis of the  
890 fecal microbial community in herbivorous land and marine iguanas of the Galápagos Islands  
891 using 16S rRNA-based pyrosequencing. *The ISME journal*, 5(9), p.1461.
- 892 Katoh, K., Rozewicki, J. and Yamada, K.D., 2017. MAFFT online service: multiple  
893 sequence alignment, interactive sequence choice and visualization. *Briefings in Bioinformatics*.
- 894 Karlsson, M., Atanasova, L., Jensen, D.F. and Zeilinger, S., 2016. Necrotrophic  
895 mycoparasites and their genomes. *Spectrum*, 5(2).
- 896 Keller, N.P., Turner, G. and Bennett, J.W., 2005. Fungal secondary metabolism—from  
897 biochemistry to genomics. *Nature Reviews Microbiology*, 3(12), p.937.

- 898           Khalidi, N., Seifuddin, F.T., Turner, G., Haft, D., Nierman, W.C., Wolfe, K.H. and  
899   Fedorova, N.D., 2010. SMURF: genomic mapping of fungal secondary metabolite clusters.  
900   *Fungal Genetics and Biology*, 47(9), pp.736-741.
- 901           Kohl, K.D., Cary, T.L., Karasov, W.H. and Dearing, M.D., 2013. Restructuring of the  
902   amphibian gut microbiota through metamorphosis. *Environmental Microbiology Reports*, 5(6),  
903   pp.899-903.
- 904           Kohler, A., Kuo, A., Nagy, L.G., Morin, E., Barry, K.W., Buscot, F., Canbäck, B., Choi,  
905   C., Cichocki, N., Clum, A. and Colpaert, J., 2015. Convergent losses of decay mechanisms and  
906   rapid turnover of symbiosis genes in mycorrhizal mutualists. *Nature Genetics*, 47(4), p.410.
- 907           Kroken, S., Glass, N.L., Taylor, J.W., Yoder, O.C. and Turgeon, B.G., 2003.  
908   Phylogenomic analysis of type I polyketide synthase genes in pathogenic and saprobic  
909   ascomycetes. *Proceedings of the National Academy of Sciences*, 100(26), pp.15670-15675.
- 910           Lawrence, M., Huber, W., Pages, H., Aboyoun, P., Carlson, M., Gentleman, R., Morgan,  
911   M.T. and Carey, V.J., 2013. Software for computing and annotating genomic ranges. *PLoS*  
912   *Computational Biology*, 9(8), p.e1003118.
- 913           Lastovetsky, O.A., Gaspar, M.L., Mondo, S.J., LaButti, K.M., Sandor, L., Grigoriev, IV.,  
914   Henry, S.A. and Pawlowska, T.E. 2016. Lipid metabolic changes in an early divergent fungus  
915   govern the establishment of a mutualistic symbiosis with endobacteria. *Proceedings of the*  
916   *National Academy of Sciences*, 113(52):15102-15107. doi: 10.1073/pnas.1615148113.
- 917           Li, H. and Durbin, R., 2009. Fast and accurate short read alignment with Burrows–  
918   Wheeler transform. *Bioinformatics*, 25(14), pp.1754-1760.

- 919 Li, H., Handsaker, B., Wysoker, A., Fennell, T., Ruan, J., Homer, N., Marth, G.,  
920 Abecasis, G. and Durbin, R., 2009. The sequence alignment/map format and SAMtools.  
921 *Bioinformatics*, 25(16), pp.2078-2079.
- 922 Luo, H., Hong, S.Y., Sgambelluri, R.M., Angelos, E., Li, X. and Walton, J.D., 2014.  
923 Peptide macrocyclization catalyzed by a prolyl oligopeptidase involved in  $\alpha$ -amanitin  
924 biosynthesis. *Chemistry & Biology*, 21(12), pp.1610-1617.
- 925 Ma, L.J., Ibrahim, A.S., Skory, C., Grabherr, M.G., Burger, G., Butler, M., Elias, M.,  
926 Idnurm, A., Lang, B.F., Sone, T., Abe, A., Calvo, S.E., Corrochano, L.M., Engels, R., Fu, J.,  
927 Hansberg, W., Kim, J.M., Kodira, C.D., Koehrsen, M.J., Liu, B., Miranda-Saavedra, D.,  
928 O'Leary, S., Ortiz-Castellanos, L., Poulter, R., Rodriguez-Romero, J., Ruiz-Herrera, J., Shen,  
929 Y.Q., Zeng, Q., Galagan, J., Birren, B.W., Cuomo, C.A. and Wickes B.L. 2009. Genomic  
930 analysis of the basal lineage fungus *Rhizopus oryzae* reveals a whole-genome duplication. *PLoS*  
931 *Genetics*, 5(7):e1000549. doi: 10.1371/journal.pgen.1000549.
- 932 Martino, E., Morin, E., Grelet, G.A., Kuo, A., Kohler, A., Daghino, S., Barry, K.W.,  
933 Cichocki, N., Clum, A., Dockter, R.B. and Hainaut, M., 2018. Comparative genomics and  
934 transcriptomics depict ericoid mycorrhizal fungi as versatile saprotrophs and plant mutualists.  
935 *New Phytologist*, 217(3), pp.1213-1229.
- 936 Medrano-Soto, A., Moreno-Hagelsieb, G., Vinuesa, P., Christen, J.A. and Collado-Vides,  
937 J., 2004. Successful lateral transfer requires codon usage compatibility between foreign genes  
938 and recipient genomes. *Molecular Biology and Evolution*, 21(10), pp.1884-1894.

- 939 Mondo, S.J., Dannebaum, R.O., Kuo, R.C., Louie, K.B., Bewick, A.J., LaButti, K.,  
940 Haridas, S., Kuo, A., Salamov, A., Ahrendt, S.R. and Lau, R., 2017. Widespread adenine N6-  
941 methylation of active genes in fungi. *Nature Genetics*, 49(6), p.964.
- 942 Morin, E., Kohler, A., Baker, A.R., Foulongne-Oriol, M., Lombard, V., Nagye, L.G.,  
943 Ohm, R.A., Patyshakuliyeva, A., Brun, A., Aerts, A.L. and Bailey, A.M., 2012. Genome  
944 sequence of the button mushroom *Agaricus bisporus* reveals mechanisms governing adaptation  
945 to a humic-rich ecological niche. *Proceedings of the National Academy of Sciences*, 109(43),  
946 pp.17501-17506.
- 947 Murphy, C., Youssef, N., Hanafy, R.A., Couger, M.B., Stajich, J.E., Wang, Y., Baker, K.,  
948 Dagar, S., Griffith, G., Farag, I. and Callaghan, T.M., 2019. Horizontal gene transfer as an  
949 indispensable driver for Neocallimastigomycota evolution into a distinct gut-dwelling fungal  
950 lineage. *bioRxiv*, p.487215.
- 951 Nagy, G., Farkas, A., Csernetics, Á., Bencsik, O., Szekeres, A., Nyilasi, I., Vágvölgyi, C.  
952 and Papp, T., 2014. Transcription of the three HMG-CoA reductase genes of *Mucor*  
953 *circinelloides*. *BMC Microbiology*, 14(1), p.93.
- 954 Nagy, L.G., Riley, R., Tritt, A., Adam, C., Daum, C., Floudas, D., Sun, H., Yadav, J.S.,  
955 Pangilinan, J., Larsson, K.H. and Matsuura, K., 2016. Comparative genomics of early-diverging  
956 mushroom-forming fungi provides insights into the origins of lignocellulose decay capabilities.  
957 *Molecular Biology and Evolution*, 33(4), pp.959-970.
- 958 Nguyen, T.A., Cissé, O.H., Wong, J.Y., Zheng, P., Hewitt, D., Nowrousian, M., Stajich,  
959 J.E. and Jedd, G., 2017. Innovation and constraint leading to complex multicellularity in the  
960 Ascomycota. *Nature communications*, 8(1), pp.1-13.

- 961           Ohm, R.A., Feau, N., Henrissat, B., Schoch, C.L., Horwitz, B.A., Barry, K.W., Condon,  
962 B.J., Copeland, A.C., Dhillon, B., Glaser, F. and Hesse, C.N., 2012. Diverse lifestyles and  
963 strategies of plant pathogenesis encoded in the genomes of eighteen Dothideomycetes fungi.  
964 *PLoS Pathogens*, 8(12).
- 965           Okagaki, L.H., Nunes, C.C., Sailsbery, J., Clay, B., Brown, D., John, T., Oh, Y., Young,  
966 N., Fitzgerald, M., Haas, B.J. and Zeng, Q., 2015. Genome sequences of three phytopathogenic  
967 species of the Magnaporthaceae family of fungi. *G3: Genes, Genomes, Genetics*, 5(12), pp.2539-  
968 2545.
- 969           O'Leary, N.A., Wright, M.W., Brister, J.R., Ciufu, S., Haddad, D., McVeigh, R., Rajput,  
970 B., Robbertse, B., Smith-White, B., Ako-Adjei, D. and Astashyn, A., 2015. Reference sequence  
971 (RefSeq) database at NCBI: current status, taxonomic expansion, and functional annotation.  
972 *Nucleic Acids Research*, 44(D1), pp.D733-D745.
- 973           Osbourn, A., 2010. Gene clusters for secondary metabolic pathways: an emerging theme  
974 in plant biology. *Plant Physiology*, 154(2), pp.531-535.
- 975           Pagès, H., Aboyoun, P., Gentleman, R. and DebRoy, R. 2019. Biostrings: Efficient  
976 manipulation of biological strings. R package version 2.52.0.
- 977           Padamsee, M., Kumar, T.A., Riley, R., Binder, M., Boyd, A., Calvo, A.M., Furukawa,  
978 K., Hesse, C., Hohmann, S., James, T.Y. and LaButti, K., 2012. The genome of the xerotolerant  
979 mold *Wallemia sebi* reveals adaptations to osmotic stress and suggests cryptic sexual  
980 reproduction. *Fungal Genetics and Biology*, 49(3), pp.217-226.
- 981           Paterson, R.R.M., 2008. Cordyceps—a traditional Chinese medicine and another fungal  
982 therapeutic biofactory?. *Phytochemistry*, 69(7), pp.1469-1495.

- 983 Pendleton, A.L., Smith, K.E., Feau, N., Martin, F.M., Grigoriev, I.V., Hamelin, R.,  
984 Nelson, C.D., Burleigh, J.G. and Davis, J.M., 2014. Duplications and losses in gene families of  
985 rust pathogens highlight putative effectors. *Frontiers in plant science*, 5, p.299.
- 986 Peypoux, F., Bonmatin, J.M. and Wallach, J., 1999. Recent trends in the biochemistry of  
987 surfactin. *Applied Microbiology and Biotechnology*, 51(5), pp.553-563.
- 988 Pusztahelyi, T., Holb, I.J. and Pócsi, I., 2015. Secondary metabolites in fungus-plant  
989 interactions. *Frontiers in Plant Science*, 6, p.573.
- 990 Quandt, C.A., Beaudet, D., Corsaro, D., Walochnik, J., Michel, R., Corradi, N. and  
991 James, T.Y., 2017. The genome of an intranuclear parasite, *Paramicrosporidium saccamoebae*,  
992 reveals alternative adaptations to obligate intracellular parasitism. *Elife*, 6, p.e29594.
- 993 Reynolds, H.T., Vijayakumar, V., Gluck-Thaler, E., Korotkin, H.B., Matheny, P.B. and  
994 Slot, J.C., 2018. Horizontal gene cluster transfer increased hallucinogenic mushroom diversity.  
995 *Evolution Letters*, 2(2), pp.88-101.
- 996 Robinson, M.D., McCarthy, D.J., and Smyth, G.K. 2010. edgeR: a Bioconductor  
997 package for differential expression analysis of digital gene expression data. *Bioinformatics* 26,  
998 139-140
- 999 Rokas, A., Mead, M. E., Steenwyk, J. L., Raja, H. A., & Oberlies, N. H. 2020.  
1000 Biosynthetic gene clusters and the evolution of fungal chemodiversity. *Natural Product Reports*  
1001 17, pp. 167-178. <http://doi.org/10.1039/c9np00045c>
- 1002 Riley, R., Salamov, A.A., Brown, D.W., Nagy, L.G., Floudas, D., Held, B.W., Levasseur,  
1003 A., Lombard, V., Morin, E., Otilar, R. and Lindquist, E.A., 2014. Extensive sampling of

- 1004 basidiomycete genomes demonstrates inadequacy of the white-rot/brown-rot paradigm for wood  
1005 decay fungi. *Proceedings of the National Academy of Sciences*, 111(27), pp.9923-9928.
- 1006
- 1007 Schwartz, V.U., Winter, S., Shelest, E., Marcet-Houben, M., Horn, F., Wehner, S.,  
1008 Linde, J., Valiante, V., Sammeth, M., Riege, K., Nowrousian, M., Kaerger, K., Jacobsen, I.D.,  
1009 Marz, M., Brakhage, A.A., Gabaldon, T., Bocker, S. and Voigt, K. 2014. Gene expansion shapes  
1010 genome architecture in the human pathogen *Lichtheimia corymbifera*: an evolutionary genomics  
1011 analysis in the ancient terrestrial mucorales (Mucoromycotina). *PLoS Genetics*, 10(8):e1004496.  
1012 doi: 10.1371/journal.pgen.1004496.
- 1013 Smith, D.J., Burnham, M.K., Edwards, J., Earl, A.J. and Turner, G., 1990. Cloning and  
1014 heterologous expression of the penicillin biosynthetic gene cluster from *Penicillium*  
1015 *chrysogenum*. *Bio/technology*, 8(1), p.39.
- 1016 Spatafora, J.W., Chang, Y., Benny, G.L., Lazarus, K., Smith, M.E., Berbee, M.L.,  
1017 Bonito, G., Corradi, N., Grigoriev, I., Gryganskyi, A. and James, T.Y., 2016. A phylum-level  
1018 phylogenetic classification of zygomycete fungi based on genome-scale data. *Mycologia*, 108(5),  
1019 pp.1028-1046.
- 1020 Stamatakis, A., 2014. RAxML version 8: a tool for phylogenetic analysis and post-  
1021 analysis of large phylogenies. *Bioinformatics*, 30(9), pp.1312-1313.
- 1022 Team, R.C., 2018. R: A language and environment for statistical computing.
- 1023 Teixeira, M.D.M., Moreno, L.F., Stielow, B.J., Muszewska, A., Hainaut, M., Gonzaga,  
1024 L., Abouelleil, A., Patané, J.S.L., Priest, M., Souza, R. and Young, S., 2017. Exploring the

- 1025 genomic diversity of black yeasts and relatives (Chaetothiriales, Ascomycota). *Studies in*  
1026 *mycology*, 86, pp.1-28.
- 1027 Terfehr, D., Dahlmann, T.A., Specht, T., Zadra, I., Kürnsteiner, H. and Kück, U., 2014.  
1028 Genome sequence and annotation of *Acremonium chrysogenum*, producer of the  $\beta$ -lactam  
1029 antibiotic cephalosporin C. *Genome Announcements*, 2(5), pp.e00948-14.
- 1030 Tisserant, E., Malbreil, M., Kuo, A., Kohler, A., Symeonidi, A., Balestrini, R., Charron,  
1031 P., Duensing, N., Frei dit Frey, N., Gianinazzi-Pearson, V., Gilbert, L.B., Handa, Y., Herr, J.R.,  
1032 Hijri, M., Koul, R., Kawaguchi, M., Krajinski, F., Lammers, P.J., Masclaux, F.G., Murat, C.,  
1033 Morin, E., Ndikumana, S., Pagni, M., Petitpierre, D., Requena, N., Rosikiewicz, P., Riley, R.,  
1034 Saito, K., San Clemente, H., Shapiro, H., van Tuinen, D., Becard, G., Bonfante, P., Paszkowski,  
1035 U., Shachar-Hill, Y.Y., Tuskan, G.A., Young, J.P., Sanders, I.R., Henrissat, B., Rensing, S.A.,  
1036 Grigoriev, I.V., Corradi, N., Roux, C. and Martin, F. 2013. Genome of an arbuscular mycorrhizal  
1037 fungus provides insight into the oldest plant symbiosis. *Proceedings of the National Academy of*  
1038 *Sciences*, 10;110(50):20117-22. doi: 10.1073/pnas.1313452110.
- 1039 Tuller, T. 2011. Codon bias, tRNA pools, and horizontal gene transfer. *Mobile Genetic*  
1040 *Elements*, 1(1), pp. 75-77, DOI: 10.4161/mge.1.1.15400
- 1041 Uehling, J., Gryganskyi, A., Hameed, K., Tschaplinski, T., Misztal, PK., Wu S., Desiro,  
1042 A., Vande Pol, N., Du, Z., Zienkiewicz, A., Zienkiewicz, K., Morin, E., Tisserant, E., Splivallo,  
1043 R., Hainaut, M., Henrissat, B., Ohm, R., Kuo, A., Yan, J., Lipzen, A., Nolan, M., LaButti, K.,  
1044 Barry, K., Goldstein, A.H., Labbe, J., Schadt, C., Tuskan, G., Grigoriev, I., Martin, F., Vilgalys,  
1045 R. and Bonito, G. 2017. Comparative genomics of *Mortierella elongata* and its bacterial  
1046 endosymbiont *Mycoavidus cysteinexigens*. 2017. *Environmental Microbiology*, 19(8):2964-  
1047 2983. doi: 10.1111/1462-2920.13669



- 1048 Vesth, T.C., Nybo, J.L., Theobald, S., Frisvad, J.C., Larsen, T.O., Nielsen, K.F., Hoof,  
1049 J.B., Brandl, J., Salamov, A., Riley, R. and Gladden, J.M., 2018. Investigation of inter-and  
1050 intraspecies variation through genome sequencing of *Aspergillus* section *Nigri*. *Nature Genetics*,  
1051 50(12), pp.1688-1695.
- 1052 Voigt, K., Wolf, T., Ochsenreiter, K., Nagy, G., Kaerger, K., Shelest, E. and Papp, T.,  
1053 2016. 15 Genetic and Metabolic Aspects of Primary and Secondary Metabolism of the  
1054 *Zygomycetes*. In *Biochemistry and Molecular Biology* (pp. 361-385). Springer, Cham.
- 1055 Wisecaver, J.H. and Rokas, A., 2015. Fungal metabolic gene clusters—caravans traveling  
1056 across genomes and environments. *Frontiers in Microbiology*, 6, p.161.
- 1057 Wang, D., Wu, R., Xu, Y. and Li, M. 2013. Draft Genome Sequence of *Rhizopus*  
1058 *chinensis* CCTCCM201021., Used for Brewing Traditional Chinese Alcoholic Beverages.  
1059 *Genome Announcements*, 1(2):e0019512. doi: 10.1128/genomeA.00195-12.
- 1060 Wang, Y., White, M.M., Kvist, S. and Moncalvo, J.M. 2016. Genome-Wide Survey of  
1061 Gut Fungi (Harpellales) Reveals the First Horizontally Transferred Ubiquitin Gene from a  
1062 Mosquito Host. *Molecular Biology and Evolution*, 33(10):2544-54. doi:  
1063 10.1093/molbev/msw126.
- 1064 Wang, Y., Youssef, N., Couger, M.B., Hanafy, R., Elshahed, M. and Stajich, J.E., 2018.  
1065 Comparative genomics and divergence time estimation of the anaerobic fungi in herbivorous  
1066 mammals. *bioRxiv*, p.401869.
- 1067 Wang, Y.Y., Liu, B., Zhang, X.Y., Zhou, Q.M., Zhang, T., Li, H., Yu, Y.F., Zhang, X.L.,  
1068 Hao, X.Y., Wang, M. and Wang, L., 2014. Genome characteristics reveal the impact of

1069 lichenization on lichen-forming fungus *Endocarpon pusillum* Hedwig (Verrucariales,  
1070 Ascomycota). *BMC Genomics*, 15(1), p.34.

1071 Wickham, H. 2016. *ggplot2: Elegant Graphics for Data Analysis*. Springer-Verlag New  
1072 York.

1073 Winter, D.J., 2017. *rentrez: An R package for the NCBI eUtils API (No. e3179v1)*. *PeerJ*  
1074 *Preprints*.

1075 Xiao, J.H. and Zhong, J.J., 2007. Secondary metabolites from *Cordyceps* species and  
1076 their antitumor activity studies. *Recent Patents on Biotechnology*, 1(2), pp.123-137.

1077 Xiao, G., Ying, S.H., Zheng, P., Wang, Z.L., Zhang, S., Xie, X.Q., Shang, Y., Leger,  
1078 R.J.S., Zhao, G.P., Wang, C. and Feng, M.G., 2012. Genomic perspectives on the evolution of  
1079 fungal entomopathogenicity in *Beauveria bassiana*. *Scientific reports*, 2, p.483.

1080 Yang, J., Wang, L., Ji, X., Feng, Y., Li, X., Zou, C., Xu, J., Ren, Y., Mi, Q., Wu, J. and  
1081 Liu, S., 2011. Genomic and proteomic analyses of the fungus *Arthrotrrys oligospora* provide  
1082 insights into nematode-trap formation. *PLoS pathogens*, 7(9).

1083 Zhang, X.Y., Bao, J., Wang, G.H., He, F., Xu, X.Y. and Qi, S.H., 2012. Diversity and  
1084 antimicrobial activity of culturable fungi isolated from six species of the South China Sea  
1085 gorgonians. *Microbial Ecology*, 64(3), pp.617-627.

1086 Zuccaro, A., Lahrmann, U., Gueldener, U., Langen, G., Pfiffi, S., Biedenkopf, D., Wong,  
1087 P., Samans, B., Grimm, C., Basiewicz, M. and Murat, C., 2011. Endophytic life strategies  
1088 decoded by genome and transcriptome analyses of the mutualistic root symbiont *Piriformospora*  
1089 *indica*. *PLoS pathogens*, 7(10).

1090

1091

1092 **Tables**

1093

1094 **Table 1.** Predicted secondary metabolite (SM) core genes for *Basidiobolus* isolates used in this  
 1095 study. NRPS: Non-ribosomal peptide synthetases, PKS: Polyketide synthases, TC: Terpene  
 1096 cyclases.

1097

| Isolate                            | Total SM | NRPS/NRPS-like | PKS/PKS-Like | NRPS-PKS hybrids | TC |
|------------------------------------|----------|----------------|--------------|------------------|----|
| <i>B. meristosporus</i> CBS 931.73 | 44       | 30             | 4            | 0                | 10 |
| <i>B. meristosporus</i> B9252      | 43       | 29             | 7            | 1                | 6  |
| <i>B. heterosporus</i> B8920       | 23       | 18             | 1            | 0                | 4  |

1098

1099

1100 **Table 2.** Number of predicted secondary metabolite core genes with evidence for HGI in  
 1101 *Basidiobolus* genomes. NRPS: Non-ribosomal peptide synthetases, PKS: Polyketide synthases,  
 1102 TC: Terpene cyclases.

1103

| Isolate                            | Total SM       | NRPS/NRPS-like | PKS/PKS-Like | NRPS-PKS hybrids | TC            |
|------------------------------------|----------------|----------------|--------------|------------------|---------------|
| <i>B. meristosporus</i> CBS 931.73 | 26/44<br>(61%) | 22/30<br>(60%) | 2/4<br>(50%) | 0/0<br>(0%)      | 2/10<br>(2%)  |
| <i>B. meristosporus</i> B9252      | 19/43<br>(44%) | 16/29<br>(55%) | 1/7<br>(14%) | 0/1<br>(0%)      | 2/6<br>(1.4%) |
| <i>B. heterosporus</i> B8920       | 12/23<br>(52%) | 12/18<br>(66%) | 0/1<br>(0%)  | 0/0<br>(0%)      | 0/4<br>(0%)   |

1104

1105

1106  
1107  
1108  
1109  
1110

**Table 3.** Summary of secondary metabolite core genes with HGT evidence from *Basidiobolus* isolates.

| Isolate                       | Gene              | Z-score of gene coverage | SM class           | Taxonomy for best NCBI hit |
|-------------------------------|-------------------|--------------------------|--------------------|----------------------------|
| <i>B. heterosporus</i>        | N168_02885        | -0.104                   | NRPS               | b-proteobacteria           |
|                               | N168_00992        | 0.028                    | NRPS               | enterobacteria             |
|                               | N168_05934        | -0.183                   | NRPS               | b-proteobacteria           |
|                               | N168_07140        | 0.260                    | NRPS               | b-proteobacteria           |
|                               | N168_06479        | 0.328                    | NRPS               | b-proteobacteria           |
|                               | N168_00176        | 0.013                    | NRPS               | cyanobacteria              |
|                               | N168_08721        | 0.561                    | NRPS               | cyanobacteria              |
|                               | N168_05966        | 0.672                    | NRPS               | d-proteobacteria           |
|                               | N168_05324        | -0.038                   | NRPS-Like          | cyanobacteria              |
|                               | N168_08580        | 0.047                    | NRPS-Like          | d-proteobacteria           |
|                               | N168_03036        | 0.022                    | NRPS-Like          | d-proteobacteria           |
| N168_04239                    | 0.070             | NRPS-Like                | b-proteobacteria   |                            |
| <i>B. meristosporus B9252</i> | N161.mRNA.1431.1  | -0.350                   | NRPS               | cyanobacteria              |
|                               | N161.mRNA.1485.1  | -0.258                   | NRPS               | d-proteobacteria           |
|                               | N161.mRNA.2152.1  | 0.074                    | NRPS               | cyanobacteria              |
|                               | N161.mRNA.4115.1  | 0.158                    | NRPS               | enterobacteria             |
|                               | N161.mRNA.4211.1  | 0.243                    | NRPS               | cyanobacteria              |
|                               | N161.mRNA.4324.1  | 0.213                    | NRPS               | CFB group bacteria         |
|                               | N161.mRNA.8304.1  | 0.358                    | NRPS               | b-proteobacteria           |
|                               | N161.mRNA.9145.1  | 0.201                    | NRPS               | cyanobacteria              |
|                               | N161.mRNA.9317.1  | 0.677                    | NRPS               | d-proteobacteria           |
|                               | N161.mRNA.9639.1  | -0.151                   | NRPS               | d-proteobacteria           |
|                               | N161.mRNA.11289.1 | 0.596                    | NRPS               | cyanobacteria              |
|                               | N161.mRNA.1486.1  | 0.662                    | NRPS-Like          | firmicutes                 |
|                               | N161.mRNA.5862.1  | 1.131                    | NRPS-Like          | firmicutes                 |
|                               | N161.mRNA.6846.1  | 0.760                    | NRPS-Like          | firmicutes                 |
|                               | N161.mRNA.6935.1  | 0.624                    | NRPS-Like          | d-proteobacteria           |
| N161.mRNA.8699.1              | -0.201            | NRPS-Like                | firmicutes         |                            |
| N161.mRNA.6146.1              | 0.999             | PKS                      | high GC Gram+      |                            |
| N161.mRNA.1413.1              | 0.481             | Terpene                  | CFB group bacteria |                            |
| N161.mRNA.13969.1             | 1.099             | Terpene                  | CFB group bacteria |                            |

|                             |        |        |               |                    |
|-----------------------------|--------|--------|---------------|--------------------|
|                             | 366903 | 0.043  | NRPS          | a-proteobacteria   |
|                             | 368581 | -0.232 | NRPS          | b-proteobacteria   |
|                             | 349800 | 0.208  | NRPS          | high GC Gram+      |
|                             | 351909 | -0.120 | NRPS          | cyanobacteria      |
|                             | 372749 | -0.088 | NRPS          | firmicutes         |
|                             | 372991 | -0.260 | NRPS          | b-proteobacteria   |
|                             | 373247 | 0.533  | NRPS          | firmicutes         |
|                             | 373940 | -0.142 | NRPS          | firmicutes         |
|                             | 375475 | 0.522  | NRPS          | enterobacteria     |
|                             | 338397 | 0.033  | NRPS          | d-proteobacteria   |
|                             | 375580 | 0.033  | NRPS          | cyanobacteria      |
|                             | 375613 | -0.369 | NRPS          | firmicutes         |
|                             | 377413 | -0.245 | NRPS          | g-proteobacteria   |
|                             | 387529 | -0.157 | NRPS          | b-proteobacteria   |
|                             | 307892 | 0.404  | NRPS          | a-proteobacteria   |
| <i>B. meristosporus</i> CBS | 298977 | -0.201 | NRPS          | b-proteobacteria   |
| 931.73                      | 343011 | 0.147  | NRPS          | firmicutes         |
|                             | 363930 | -0.358 | NRPS          | firmicutes         |
|                             | 300898 | -0.165 | NRPS-<br>Like | firmicutes         |
|                             | 322666 | -0.174 | NRPS-<br>Like | CFB group bacteria |
|                             | 146993 | -0.200 | NRPS-<br>Like | cyanobacteria      |
|                             | 382467 | -0.264 | NRPS-<br>Like | a-proteobacteria   |
|                             | 340613 | -0.136 | NRPS-<br>Like | GNS bacteria       |
|                             | 237744 | -0.001 | PKS           | bacteria           |
|                             | 292783 | -0.429 | PKS           | high GC Gram+      |
|                             | 301341 | -0.210 | Terpene       | CFB group bacteria |
|                             | 304520 | 0.389  | Terpene       | cyanobacteria      |



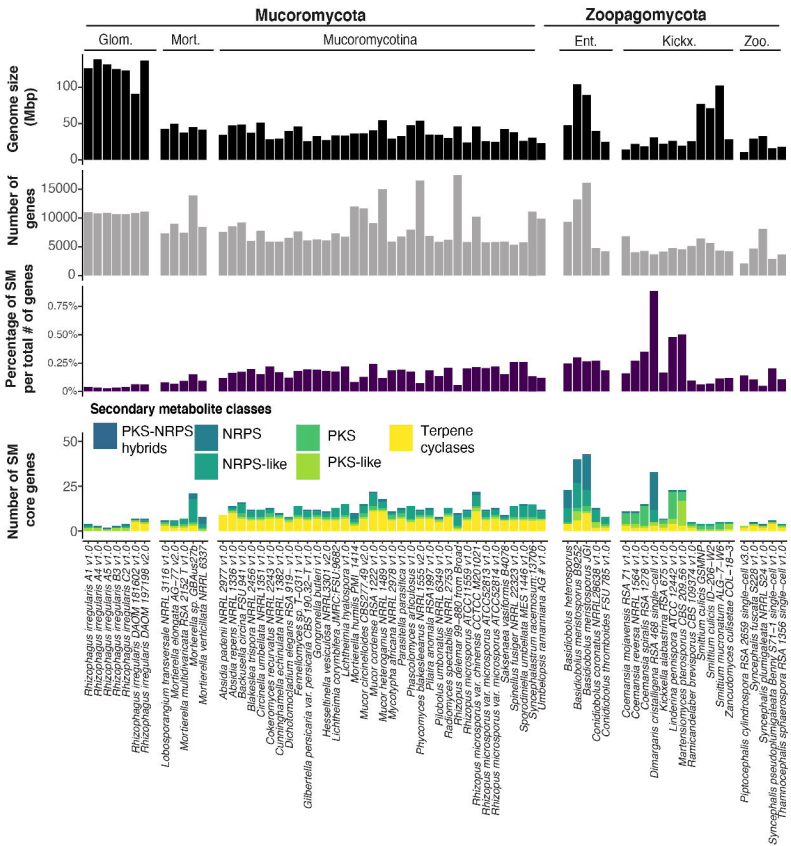

Figure 1. Genome size, number of genes, proportion of secondary metabolite (SM) gene clusters and number of predicted SM gene clusters for 66 Zoopagomycota and Mucoromycota sequenced genomes. Color code represents the category of SM predicted per isolate. NRPS: Non-ribosomal peptide synthetases. PKS: Polyketide synthases. Glom.: Glomeromycotina. Mort.: Morterellomycotina. Ent.: Entomophthoromycotina. Kickx.: Kickellomycotina. Zoo.: Zoopagomycotina



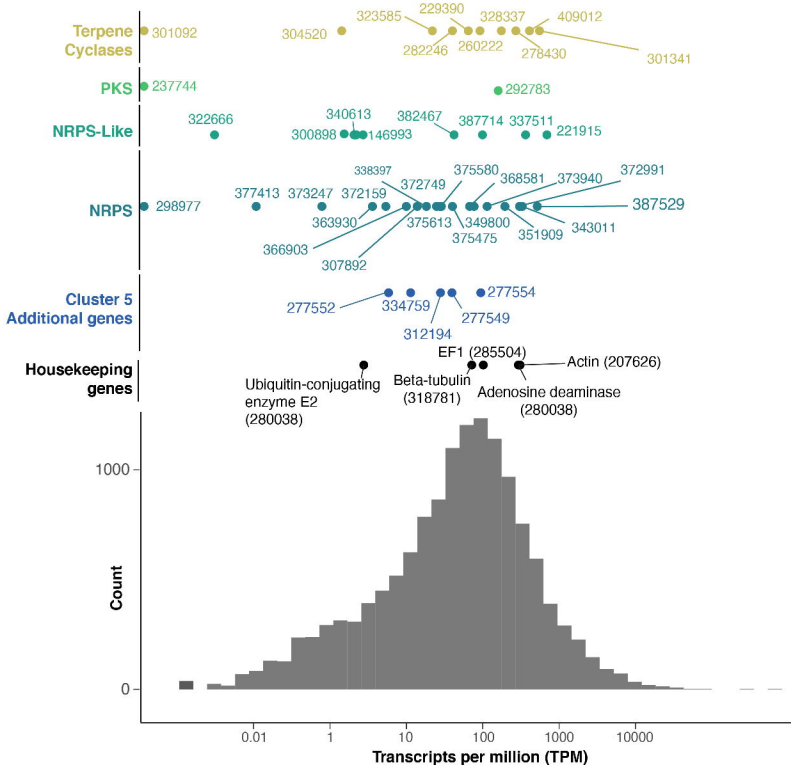

Figure 2. Distribution of number of RNAseq counts in transcripts per million (TPM) per genic feature from *B. meristosporus* CBS 931.73. Colors represent SM and genes of interest. X-axis represents the TPM count. Y-axis represents distribution of TPM. The scale is in  $\log(\text{TPM})$ , and the values are in TPM absolute values. Histogram represents the distribution of mapped reads in TPM for all predicted gene models with non-zero TPM values across the *B. meristosporus* CBS 931.73 genome.

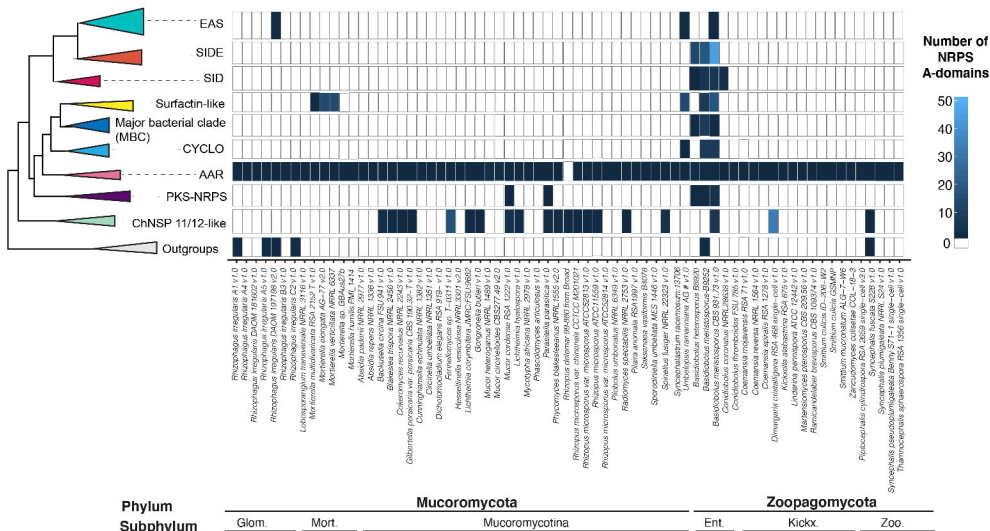

Figure 3. Phylogenetic sources and abundance of A-domains from NRPS predicted gene models for Zoopagomycota and Mucoromycota species. The maximum likelihood phylogenetic tree (left) represent a simplification of the reconstructed tree which includes the clades that include more than one A-domain from Mucoromycota/Zoopagomycota genomes. The heatmap (right) represents the abundances A-domains predicted for each domain clustered within each clade. *Basidiobolus* species are enriched in NRPS from the major bacterial clade (MBC), cyclosporin (CYCLO), surfactin-like, and siderophore (SIDE, SID) clades.

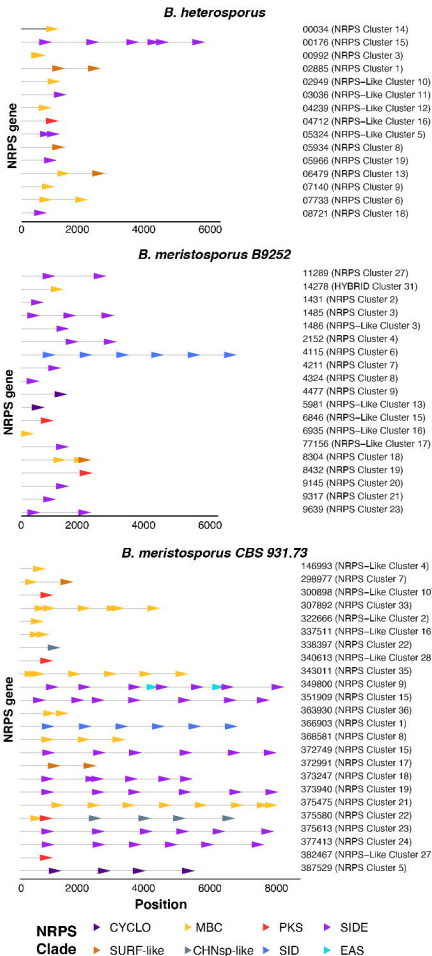

Figure 4. Graphical representation of the A-domains of each NRPS core gene predicted for *Basidiobolus* genomes. Horizontal grey lines represent the length of the predicted NRPS core gene. Arrows represent A-domains and are located in the position within the gene model. Colors represent the phylogenetic origin. Numbers represent the name of each gene model and predicted SM cluster for each genome.



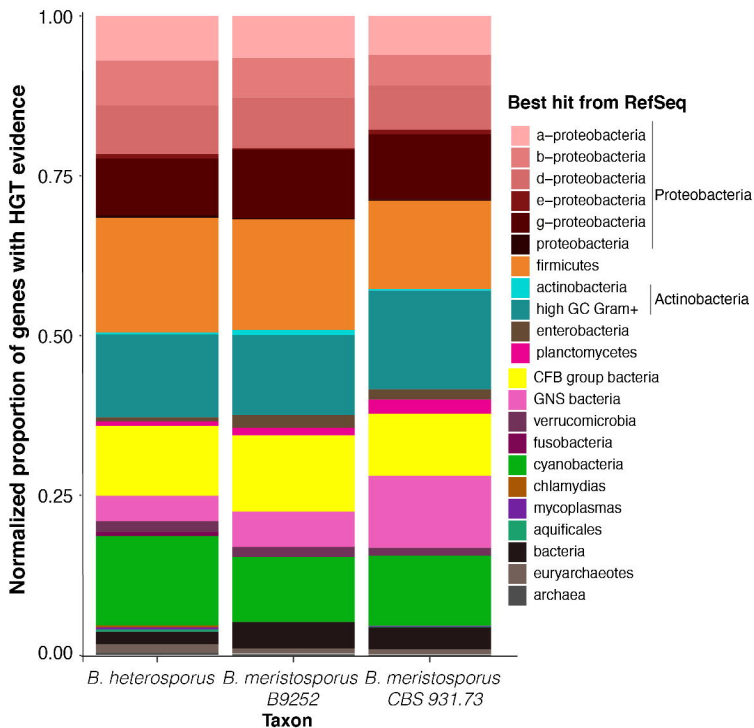

Figure 6. Plausible taxonomic sources of HGT genes. Bar-plot represents the proportion of diversity of HGT candidates for each *Basidiobolus* genome. Colors represent the taxonomy term for the RefSeq best hit from BLAST. Overall, between 3% to 5% of the gene models predicted for *Basidiobolus* species appear to be product of HGT from taxonomic groups of bacteria associated to reptilian and amphibian gut tracts (Proteobacteria, firmicutes, and CFB/bacterioidetes).

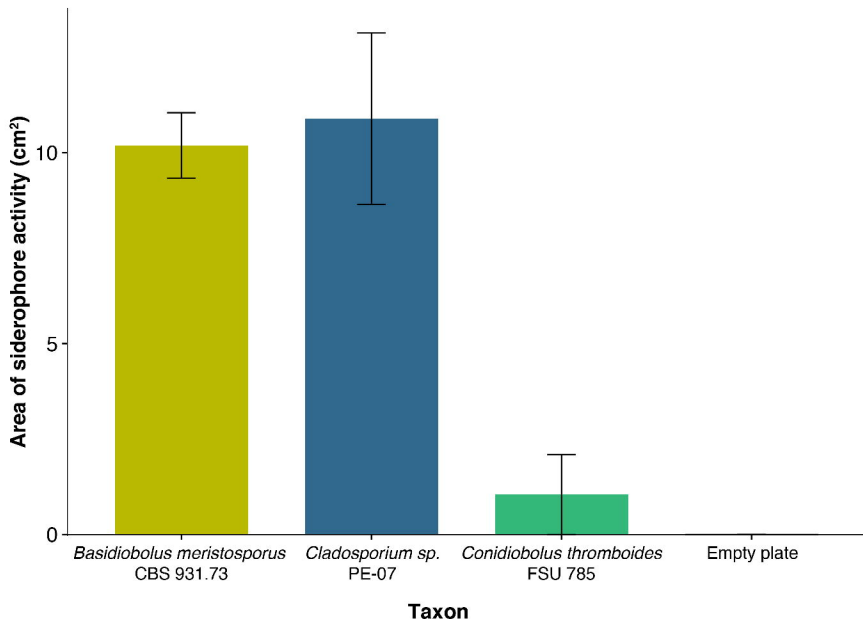

Figure 7. Siderophore activity of *Basidiobolus meristosporus* CBS 931.73 in a universal CAS assay using layered AY-CAS plates after 12 days. Bars represent mean siderophore activity measured per strain as the yellow area in AY-CAS plates for three replicates. Error bars represent the standard deviation for each replicate. *Cladosporium sp.* PE-07 represents the positive control. *Conidiobolus thromboides* FSU 785 represents a zygomycete with no evidence for siderophore NRPS expansion.
